1 **Title** (88 chars < 120): Punctuated evolution and transitional hybrid network in an  
2 ancestral cell cycle of fungi

3  
4 **Authors:** Edgar M. Medina<sup>1,2</sup>, Jonathan J. Turner<sup>3</sup>, Jan M. Skotheim<sup>3</sup>, and Nicolas E.  
5 Buchler<sup>1,2</sup>

6  
7 <sup>1</sup> Department of Biology, Duke University, Durham, NC, 27708, USA

8 <sup>2</sup> Center for Genomic and Computational Biology, Duke University, Durham, NC,  
9 27710, USA

10 <sup>3</sup> Department of Biology, Stanford University, Stanford, CA, 94305, USA

11  
12 **Contact:** nicolas.buchler@duke.edu

13  
14 **Abstract:** (130 words < 150)

15  
16 Although cell cycle control is an ancient, conserved, and essential process, some core  
17 animal and fungal cell cycle regulators share no more sequence identity than non-  
18 homologous proteins. Here, we show that evolution along the fungal lineage was  
19 punctuated by the early acquisition and entrainment of the SBF transcription factor.  
20 Cell cycle evolution in the fungal ancestor then proceeded through a hybrid network  
21 containing both SBF and its ancestral animal counterpart E2F, which is still  
22 maintained in many basal fungi. We hypothesize that a viral SBF may have initially  
23 hijacked cell cycle control by activating transcription via the *cis*-regulatory elements  
24 targeted by the ancestral cell cycle regulator E2F, much like extant viral oncogenes.  
25 Consistent with this hypothesis, we show that SBF can regulate promoters with E2F  
26 binding sites in budding yeast.

27  
28 **Impact statement** (15-30 words): Cell cycle network evolution in a fungal ancestor  
29 was punctuated by arrival of a viral DNA-binding protein that was permanently  
30 incorporated into the G1/S regulatory network controlling cell cycle entry.

31  
32 **Keywords:** cell cycle / evolution / fungi / chytrid / virus

## 33 INTRODUCTION

34

35 The networks regulating cell division in yeasts and animals are highly similar in both  
36 physiological function and network structure (Figure 1) (Cross et al., 2011; Doonan  
37 and Kitsios, 2009). For example, the cell cycle controls proliferation in response to a  
38 variety of internal and external signals during the G1 phase, between cell division  
39 and DNA replication. These input signals, including cell growth, are integrated into a  
40 gradual increase in cyclin dependent kinase (Cdk) activity, which triggers a feedback  
41 loop at the basis of the all-or-none irreversible decision to proliferate (Bertoli et al.,  
42 2013).

43

44 Many of the molecular mechanisms underlying G1 regulation are highly conserved.  
45 In animal cells, Cyclin D, in complex with either Cdk4 or Cdk6, initiates cell cycle  
46 entry by phosphorylating the retinoblastoma protein, pRb. This begins the  
47 inactivation of pRb and the concomitant activation of the E2F transcription factors  
48 that induce transcription of downstream cyclins E and A, which complete the  
49 inhibition of pRb thereby forming a positive feedback loop (Bertoli et al., 2013).  
50 Similarly, in budding yeast, the G1 cyclin Cln3-Cdk1 complex initiates the transition  
51 by phosphorylating and partially inactivating Whi5, an inhibitor of the SBF  
52 transcription factor (Costanzo et al., 2004; de Bruin et al., 2004; Nasmyth and  
53 Dirick, 1991; Ogas et al., 1991; Sidorova and Breeden, 1993). This allows for SBF-  
54 dependent transcription of the downstream G1 cyclins *CLN1* and *CLN2*, which also  
55 inactivate Whi5 to complete a positive feedback loop (Skotheim et al., 2008). Thus,  
56 both the biochemical function of G1 regulators and their specific targets are highly  
57 conserved (Figure 1).

58

59 Many of the individual proteins performing identical roles are unlikely to be true  
60 orthologs, *i.e.*, it cannot be inferred from sequence identity that the proteins evolved  
61 from a common ancestral gene. In yeast, a single cyclin-dependent kinase, Cdk1,  
62 binds distinct cyclin partners to perform all the functions of three non-orthologous  
63 animal Cdks (Cdk2, 4 and 6) during cell cycle entry (Liu and Kipreos, 2000).  
64 Furthermore, no member of the transcription factor complex SBF-Whi5 exhibits  
65 amino acid sequence identity or structural similarity to any member of the E2F-pRb  
66 complex (Cross et al., 2011; Hasan et al., 2013; Taylor et al., 1997). Finally, Cdk  
67 inhibitors such as Sic1 and p27 play analogous roles in yeast and mammals despite a

68 total lack of sequence identity (Cross et al., 2011). Taken together, these examples  
69 imply significant evolution of cell cycle regulatory proteins in fungi and/or animals  
70 while the network topology remains largely intact. While identification of network  
71 topology is restricted to a few model organisms and is not as broad as sequence  
72 analysis, the similar network topology in budding yeast and animals suggests that  
73 this feature is more conserved than the constituent regulatory proteins (Cross et al.,  
74 2011; Doonan and Kitsios, 2009).

75

76 The shared presence of E2F-pRb within plants (Archaeplastida) and animal  
77 (Metazoa) lineages indicates that this regulatory complex, rather than the fungal  
78 SBF-Whi5 complex, was present in the last eukaryotic common ancestor (Cao et al.,  
79 2010; Doonan and Kitsios, 2009; Fang et al., 2006; Harashima et al., 2013). The  
80 divergence of G1 regulator sequences is surprising because fungi and animals are  
81 more closely related to one another than either is to plants. This fungal-metazoan  
82 difference raises the question as to where the fungal components came from. Fungal  
83 components could either be rapidly evolved ancestral regulators or have a distinct  
84 evolutionary history, which would suggest convergent evolution of regulatory  
85 networks.

86

87 Here, we examine conserved and divergent features of eukaryotic cell cycle  
88 regulation. In contrast to previous work that considered a protein family of cell cycle  
89 regulators in isolation (Cao et al., 2010; 2014; Eme et al., 2011; Gunbin et al.,  
90 2011; Ma et al., 2013; Wang et al., 2004), we studied the evolutionary history of an  
91 entire regulatory network. We examined a greater number of genomes covering  
92 most of eukaryotic diversity, including Excavata, Haptophyta, Cryptophyta, SAR  
93 (Stramenopiles, Alveolata & Rhizaria), Archaeplastida (plants), Amoebozoa,  
94 Apusozoa and the Opisthokonta (animals and fungi). This survey allowed us to  
95 estimate the cell cycle repertoire of the last eukaryotic common ancestor (LECA), a  
96 prerequisite to clarifying the evolutionary transitions of the cell cycle components of  
97 both animals and fungi.

98

99 Our results indicate that LECA likely had complex cell cycle regulation involving at  
100 least one Cdk, multiple cyclin families, activating and inhibitory E2F transcription  
101 factors, and pRb-family pocket proteins. The LECA repertoire helps establish that the  
102 emergence of SBF-Whi5 is abrupt and distinguishes fungi from all other eukaryotes.

103 We also show that basal fungi can have both ancestral E2F-pRb and fungal SBF-Whi5  
104 components. Thus, fungal evolution appears to have proceeded through a hybrid  
105 network before abruptly losing the ancestral components in the lineage leading to  
106 Dikarya. This supports the hypothesis that network structure, but not the individual  
107 components, has been conserved through the transition to fungi and argues against  
108 the case of convergent evolution.

109

110 Finally, our data confirm that SBF shows homology to Kila-N, a poorly characterized  
111 domain present in prokaryotic and eukaryotic DNA viruses. Thus, SBF is not derived  
112 from E2F (its functional analog) and likely emerged through horizontal gene transfer  
113 in the fungal ancestor. That SBF can still regulate promoters with E2F binding sites  
114 in budding yeast suggests that a viral SBF may have initially hijacked cell cycle  
115 control, activating transcription via the *cis*-regulatory elements targeted by the  
116 ancestral cell cycle regulator E2F, much like extant viral oncogenes.

117

## 118 **RESULTS**

119

### 120 **Reconstruction of complex cell cycle control in the ancestral eukaryote**

121 Recent work shows that the last eukaryotic common ancestor (LECA) already had a  
122 complex repertoire of proteins (Dacks and Field, 2007; Eichinger et al., 2005;  
123 Merchant et al., 2007). Indeed, all sequenced eukaryotic lineages have lost entire  
124 gene families that were present in LECA (Fritz-Laylin et al., 2010). In contrast to the  
125 growing consensus that LECA had an extensive repertoire of proteins, the prevailing  
126 view of the LECA cell cycle is that it was based on a simple oscillator constructed  
127 with relatively few components (Coudreuse and Nurse, 2010; Nasmyth, 1995).  
128 According to the 'simple' LECA cell cycle model, an ancestral oscillation in Cyclin B-  
129 Cdk1 activity drove periodic DNA replication and DNA segregation, while other  
130 aspects of cell cycle regulation, such as G1 control, may have subsequently evolved  
131 in specific lineages. The model was motivated by the fact that Cdk activity of a single  
132 Cyclin B is sufficient to drive embryonic cell cycles in frogs (Murray and Kirschner,  
133 1989) and fission yeast (Stern and Nurse, 1996), and that many yeast G1 regulators  
134 have no eukaryotic orthologs (Figure 1).

135

136 To determine the complexity of LECA cell cycle regulation, we examined hundreds of  
137 diverse eukaryotic genomes (Fungi, Amoebozoa, Excavata, SAR, Haptophyta,

138 Cryptophyta). We first built sensitive profile Hidden Markov Models (Eddy, 2011) for  
139 each of the gene families of cell cycle regulators from model organisms *Arabidopsis*  
140 *thaliana*, *Homo sapiens*, *Schizosaccharomyces pombe*, and *Saccharomyces*  
141 *cerevisiae*. These HHMs were then used to query the sequenced eukaryotic genomes  
142 for homologs of both fungal and animal cell cycle regulators (Figures 2-3; see  
143 Methods). Phylogenetic analyses were performed on the detected homologs for  
144 accurate sub-family assignment of the regulators and infer their evolutionary history  
145 (see Methods). If LECA regulation were simple, we would expect little conservation  
146 beyond the Cyclin B-Cdk1 mitotic regulatory module. However, if LECA regulation  
147 were more complex, we would expect to see broad conservation of a wider variety of  
148 regulators.

149  
150 We did not find either of the fungal regulators, SBF and Whi5, in any Archaeplastida,  
151 Amoebozoa, SAR, Haptophyta, Cryptophyta, Excavata or Metazoa. However, we did  
152 find the cyclin sub-families (A, B, D, and E) known to regulate the cell cycle in  
153 metazoans across all major branches of eukaryotes (for cyclin phylogeny see Figure  
154 3-figure supplement 1). We also found examples of all three sub-families of E2F  
155 transcription factors (E2F1-6, DP, E2F7/8) and the pRb family of pocket proteins (for  
156 E2F/DP and pRb phylogeny see Figure 3-figure supplement 2 and Figure 3-figure  
157 supplement 3). Nearly all species contain the APC specificity subunits Cdc20 and  
158 Cdh1/Fzr1, which regulate exit from mitosis and maintain low Cdk activity in G1 (for  
159 Cdc20-family APC phylogeny see Figure 3-figure supplement 4). Taken together,  
160 these data indicate that LECA cell cycle regulation was based on multiple cyclin  
161 families, as well as regulation by the APC complex and members of the pRb and E2F  
162 families.

163  
164 Members of the Cdk1-3 family (i.e. CdkA in plants) are also broadly conserved across  
165 eukaryotes, suggesting they were the primary LECA cell cycle Cdks (for CDK  
166 phylogeny see Figure 3-figure supplement 5). Other cell cycle Cdk families in animal  
167 (Cdk4/6) and plant (CdkB) are thought to be specific to those lineages. However, we  
168 found CdkB in Stramenopiles, which may have arrived via horizontal transfer during  
169 an ancient secondary endosymbiosis with algae as suggested by (Cavalier-Smith,  
170 1999). We excluded from our analysis other families of cyclin-Cdks including Cdk7-9,  
171 which regulate transcription and RNA processing, and Cdk5 (yeast Pho85), which  
172 regulate cell polarity, nutrient regulation, and contribute to cell cycle regulation in

173 yeast (Cao et al., 2014; Guo and Stiller, 2004; Ma et al., 2013; Moffat and Andrews,  
174 2004). While interesting and important, an extensive examination of these cyclin-  
175 Cdk families is beyond the scope of this work.

176

### 177 **A hybrid E2F-pRb-SBF-Whi5 network on the path of fungal evolution**

178

179 To identify the possible origins of SBF and Whi5, we searched for sequence homologs  
180 across eukaryotic genomes (see Methods). We were unable to find any eukaryotic  
181 homologs of SBF or Whi5 outside of fungi, with one exception that we discuss in the  
182 next section. The emergence of the new fungal components SBF, which includes the  
183 large APSES family, and Whi5 is abrupt and occurs near the split of basal fungi from  
184 metazoans (Figures 4-5; for SBF only, SBF+APSES, and Whi5 phylogeny see Figure  
185 5-figure supplement 1, Figure 5-figure supplement 2, and Figure 5-figure  
186 supplement 3). The precise location remains unclear because we have only 1  
187 Nuclearioid genome and Microsporidia are fast-evolving fungal parasites with reduced  
188 genomes (Cuomo et al., 2012). Interestingly, the new regulators (SBF and Whi5)  
189 and ancestral regulators (E2F and Rb) co-exist broadly across basal fungi and the  
190 lineages formerly known as "zygomycetes". At one extreme, Chytridiomycota (*e.g.*,  
191 *Spizellomyces punctatus*) can have both fungal and animal cell cycle regulators,  
192 which likely represents the ancestral hybrid network. However, this hybrid network  
193 was evolutionarily unstable, as different constellations of components are present in  
194 the extant zygomycetes and basal fungi. For example, the zygomycetes have lost  
195 pRb while retaining E2F, which was then abruptly lost in the transition to Dikarya.  
196 The instability of the hybrid network suggests some functional redundancy between  
197 the new SBF-Whi5 and ancient E2F-Rb pathway.

198

### 199 **The SBF and E2F family of transcription factors are unlikely to be orthologs.**

200

201 The DNA-binding domains of SBF/MBF (Taylor et al., 2000; Xu et al., 1997) and  
202 E2F/DP (Zheng et al., 1999) are structurally classified as members of the winged-  
203 helix-turn-helix (wHTH) family, which is found in both prokaryotes and eukaryotes  
204 (Aravind and Koonin, 1999; Aravind et al., 2005; Gajiwala and Burley, 2000).  
205 Although the DNA-binding domains of E2F/DP and SBF/MBF are both classified as  
206 wHTH proteins, they show important differences in sequence, overall structure, and

207 mode of protein-DNA complex formation that lead us to conclude that it is highly  
208 unlikely that they are orthologs.

209

210 The strongest arguments against SBF-E2F orthology are based on structural biology.  
211 Many WTH transcription factors, including the E2F/DP family, have a 'recognition  
212 helix' that interacts with the major or minor grooves of the DNA. The E2F/DP family  
213 has an RXYD DNA-recognition motif in its helix that is invariant within the E2F/DP  
214 family and is responsible for interacting with the conserved, core GCGC motif (Zheng  
215 et al., 1999) (see Figure 6A: red structure). The RXYD recognition motif is strikingly  
216 conserved in E2F/DP across all eukaryotes, including the E2F/DP proteins uncovered  
217 in basal fungi (Figure 6B, left). In contrast, the first solved SBF/MBF structure, Mbp1  
218 from *S. cerevisiae* in the absence of DNA, suggested Mbp1 recognizes its MCB (Mlu I  
219 cell cycle box, ACGCGT) binding site via a recognition helix (Taylor et al., 1997; Xu  
220 et al., 1997). A recent structure of PCG2, an SBF/MBF homolog in the rice blast  
221 fungus *Magnaporthe oryzae*, in complex with its MCB binding site does not support  
222 this proposed mode of DNA binding (Liu et al., 2015). In striking contrast to many  
223 WTH structures, in which the recognition helix is the mediator of DNA binding  
224 specificity, the wing of PCG2 binds to the minor groove to recognize the MCB binding  
225 site. The two glutamines in the wing (Q82, Q89) are the key elements that recognize  
226 the core MCB binding motif CGCG (Figure 6A, blue structure). Family-specific  
227 conservation in the DNA-binding domain is observed for all members of the SBF and  
228 APSES family, including basal fungal sequences (Figure 6B, right). In summary, the  
229 incongruences in sequence, structure, and mode of DNA-interaction between E2F/DP  
230 and SBF/MBF families strongly suggest that SBF is not derived from E2F.

### 231 **Viral origin and evolution of the fungal SBF and APSES family**

232 Since SBF is unlikely to be orthologous to the E2F family of transcription factors, we  
233 therefore sought an alternative evolutionary origin. SBF is a member of a larger  
234 family of transcription factors in yeast that includes Xbp1, Bqt4, and the APSES  
235 family (Acm1, Phd1, Sok2, Egf1, StuA); see Figure 5. Previous work has shown that  
236 the DNA-binding domain of the APSES and SBF proteins is homologous to a viral  
237 Kila-N domain (Iyer et al., 2002). Kila-N is a member of a core set of "viral hallmark  
238 genes" found across diverse DNA viruses that infect eubacteria, archaea, and  
239 eukaryotes (Koonin et al., 2006). Outside the fungal SBF/APSES sub-family, little is  
240 known about the Kila-N domain structure, its DNA-binding recognition sequence, and  
241 function (Brick et al., 1998). The wide distribution of DNA viruses and Kila-N across

242 the three domains of life suggests that the fungal ancestor likely acquired SBF via  
243 horizontal gene transfer.

244

245 We were unable to find ancestral SBF-like proteins in other eukaryotes—with the  
246 notable exception of *Trichomonas vaginalis*, a parasitic excavate that has over 100  
247 homologs. These potential SBF homologs were compared to the Uniprot protein  
248 database, and their best sequence matches were to Mimivirus, a large double-  
249 stranded DNA virus of the Nucleo-Cytoplasmic Large DNA Viruses (Yutin et al.,  
250 2009). Upon closer inspection, both fungal SBF sequences and *T. vaginalis* Mimivirus  
251 sequences share the viral Kila-N domain. To gain insight into the possible  
252 evolutionary origins of the SBF subfamily, we aligned all Kila-N sequences from the  
253 Uniprot and PFAM database (Finn et al., 2014) to all our fungal SBF sequences and  
254 built a phylogenetic tree (Figure 7). There are three major phylogenetic groups of  
255 Kila-N domains: those found in eukaryotic viruses, prokaryotic viruses, and the  
256 fungal SBF family. Our current phylogeny is unable to distinguish whether the SBF  
257 family arrived in a fungal ancestor through a eukaryotic virus or a phage-infected  
258 bacterium. Structural and functional characterization of existing viral Kila-N domains  
259 could help distinguish between these two hypotheses. However, our phylogeny does  
260 show that *T. vaginalis* obtained its Kila-N proteins independently from the fungal  
261 ancestor because its Kila-N domains are clearly placed within the eukaryotic DNA  
262 viruses (e.g., Mimivirus) rather than with the fungal subfamily (Figure 7).

### 263 **SBF ancestor could regulate E2F-target genes**

264

265 Of all the members of the SBF/APSES family, the most likely candidate to be a  
266 “founding” TF is SBF, as it is the only member present in all fungi. In budding yeast  
267 and other fungi, SBF functions in G1/S cell cycle regulation and binds a consensus  
268 site CGCGAA (Gordân et al., 2011), which overlaps with the consensus site  
269 GCGSSAAA for the E2F family (Rabinovich et al., 2008). The APSES regulators, Xbp1,  
270 and MBF in budding yeast bind TGCA, TCGA, ACGCGT motifs, respectively. A viral  
271 origin of the SBF/APSES family—with the founding member involved in cell cycle  
272 control—suggests the hypothesis that perhaps the founder TF functioned like a DNA  
273 tumor virus protein and hijacked cell cycle control to promote proliferation.

274

275 For the viral TF (SBF) to hijack cell cycle control in the fungal ancestor, it must have  
276 been able to both bind E2F regulatory regions and then activate the expression of



277 genes under E2F in a cell cycle-regulated fashion. The overlap between the  
278 conserved E2F and SBF consensus sites suggests that ancestral SBF could bind E2F  
279 regulatory regions. However, a single base pair substitution in the SBF motif can  
280 reduce gene expression by up to ~95% (Andrews and Moore, 1992) and flanking  
281 regions outside the core are often important for binding affinity and gene expression  
282 (Nutiu et al., 2011). To test whether yeast SBF can bind a canonical E2F binding site,  
283 we inserted consensus E2F binding sites in the budding yeast genome; see Figure 8.  
284 The hijacking hypothesis would be supported *in vivo* if E2F binding sites could  
285 generate SBF-dependent cell cycle regulated gene expression. We used the well-  
286 studied *CLN2* promoter, which has three binding sites for SBF (SCB, Swi6-dependent  
287 cell cycle box) in a nucleosome-depleted region. Removal of these SCB sites is  
288 known to eliminate cell cycle-dependent gene expression (Bai et al., 2010). We  
289 changed all three SCBs to the E2F binding site variant GCGCGAAA known to regulate  
290 the histone gene cluster in mammals (Rabinovich et al., 2008). We observed  
291 significant oscillations in GFP expression, which were coordinated with the cell cycle.  
292 Importantly, the amplitude of these oscillations was dependent on the budding yeast  
293 SBF, but not MBF, and disappeared when the 3 binding sites were removed. Taken  
294 together, this set of *in vivo* experiments lends support to the hijacking hypothesis,  
295 where an ancestral SBF took control of several E2F-regulated genes.

296

## 297 **DISCUSSION**

298

299 Cell division is an essential process that has been occurring in an uninterrupted chain  
300 for billions of years. Thus, one expects strong conservation in the regulatory network  
301 controlling the eukaryotic cell division cycle. Consistent with this idea, cell cycle  
302 network structure is highly similar in budding yeast and animal cells. However, many  
303 components performing similar functions, such as the central SBF and E2F  
304 transcription factors, lack sequence identity suggesting a significant degree of  
305 evolution or independent origin. To identify axes of conservation and evolution in  
306 eukaryotic cell cycle regulation, we examined a large number of genome sequences  
307 in Archaeplastida, Amoebozoa, SAR, Haptophyta, Cryptophyta, Excavata, Metazoa  
308 and Fungi. Across eukaryotes, we found a large number of proteins homologous to  
309 metazoan rather than fungal G1/S regulators. Our analysis indicates that the last  
310 eukaryotic common ancestor likely had complex cell cycle regulation based on Cdk1,  
311 Cyclins D, E, A and B, E2F, pRb and APC family proteins.

312

313 In contrast, SBF was not present in the last common eukaryotic ancestor, and  
314 abruptly emerged, with its regulator Whi5, in fungi likely due to the co-option of a  
315 viral protein at the base of the fungal lineage. The origin of Whi5 is unclear because  
316 we found no homologs outside of fungi. Whi5 is a mostly unstructured protein,  
317 which, like pRb, recruits transcriptional inhibitor proteins to specific sites on DNA via  
318 transcription factor binding (Huang et al., 2009; Wang et al., 2009). The relatively  
319 simple structure of Whi5 suggests that it may have been subsequently co-opted as a  
320 phosphopeptide to entrain SBF activity to cell cycle regulated changes in Cdk activity  
321 (Figure 9).

322

323 The replacement of E2F-Rb with SBF-Whi5 at the core of the cell cycle along the  
324 fungal lineage raises the question as to how such a drastic change to fundamental  
325 regulatory network could evolve? One answer can be found in the evolution of  
326 transcription factors. When the function of an essential transcription factor does  
327 change, it often leaves behind a core part of its regulon for another factor (Brown et  
328 al., 2009; Gasch et al., 2004; Lavoie et al., 2009). This process of handing off  
329 transcription factor function has been observed to proceed through an intermediate  
330 state, present in some extant genomes, in which both factors perform the function  
331 (Tanay et al., 2005). The logic of proceeding through an intermediate state has been  
332 well-documented for the regulation of genes expressed only in yeast of mating type  
333 **a** (asgs) (Tsong et al., 2006). In the ancestral yeast and many extant species, asgs  
334 expression is activated by a protein only present in **a** cells, while in other yeasts,  
335 expression is repressed by a protein only present in  $\alpha$  cells and **a**/ $\alpha$  diploids. The  
336 replacement of the ancestral positive regulation by negative regulation occurred via  
337 yeast that contained both systems illustrating how an essential function can evolve  
338 through a hybrid state (Baker et al., 2012).

339

340 Clearly, something similar happened during cell cycle evolution. It appears that the  
341 replacement of the E2F-pRb transcription regulatory complex with the SBF-Whi5  
342 complex proceeded via a hybrid intermediate that preserved its function. In the  
343 hybrid intermediate, E2F-Rb and SBF-Whi5 may have evolved to be parallel  
344 pathways whose functions overlapped to such an extent that the previously essential  
345 E2F-Rb pathway could be lost in the transition to Dikarya. Interestingly, many basal  
346 fungi have preserved rather than lost this hybrid intermediate, which suggests that

347 each pathway may have specialized functions. Chytrids exhibit both animal (e.g.  
348 centrioles, flagella, amoeboid movement) and fungal features (e.g. cell walls, hyphal  
349 morphology) whose synthesis needs to be coordinated with cell division. The  
350 preservation of the hybrid network in chytrids could then be explained if animal and  
351 fungal features are regulated by the E2F-Rb and SBF-Whi5 pathways respectively.

352

353 The origin of the hybrid network at the base of Fungi is abrupt and may have been  
354 initiated by the arrival of SBF via virus. Many tumor viruses activate cell  
355 proliferation. For example, the DNA tumor viruses Adenovirus and SV40 hijack cell  
356 proliferation in part by activating the expression of E2F-dependent genes by binding  
357 pRb to disrupt inhibition of E2F (DeCaprio, 2009). While the specific mechanisms  
358 may differ, when SBF entered the fungal ancestor cell it might have activated the  
359 transcription of E2F target genes. Rather than inhibiting the inhibitor of E2F, SBF  
360 may have directly competed for E2F binding sites with transcriptionally inactive Rb-  
361 E2F complexes (Figure 9). Consistent with this model, we have shown here that SBF  
362 can directly regulate gene expression in budding yeast via a consensus E2F binding  
363 site. Thus, the cooption of a viral protein generated a hybrid network to ultimately  
364 facilitate dramatic evolution of the core cell cycle network in fungi.

365

## 366 **MATERIALS AND METHODS**

### 367 **Identification of potential protein family homologs.**

368 We used Profile-Hidden Markov Models (profile-HMMs) to detect homologs for each of  
369 the families studied, using the HMMER 3 package (Eddy, 2011). Profile-HMMs are  
370 sensitive tools for remote homology detection. Starting with a set of diverse yet  
371 reliable protein homologs is fundamental for detecting remote protein homology and  
372 avoiding "model poisoning" (Johnson et al., 2010). To this end, we used reliable  
373 training-set homologs from the cell cycle model organisms *Arabidopsis thaliana*,  
374 *Homo sapiens*, *Schizosaccharomyces pombe*, and *Saccharomyces cerevisiae*, to build  
375 the profile-HMMs used to detect homologs. Our profile-HMM search used a stringent  
376 e-value threshold of 1e-10 to detect putative homologs in the "best" filtered protein  
377 sets (where available) of our 100+ eukaryotic genomes (see Supplementary File 1A  
378 for genome details). All putative homologs recovered through a profile-HMM search  
379 were further validated (or rejected) using an iterative search algorithm (Jackhmmmer)

380 against the annotated SwissProt database using the HMMER web server (Finn et al.,  
381 2011).

382

383 Our profile-HMM for E2F/DP family only detects E2F or DP, where as our profile-HMM  
384 for SBF/MBF family only detects SBF/MBF (or APSES). The same protein was never  
385 identified by both profile-HMMs because the sequence profiles and the structure are  
386 different. In the case of basal fungi, which have both E2F/DP and SBF/MBF, all  
387 proteins classified as an E2F/DP had clear homology to E2F or DP (see alignment in  
388 new Figure 6B) and all proteins that we classified as SBF/MBF had clear homology to  
389 SBF/MBF (see alignment in new Figure 6B). Thus, we have not misclassified E2Fs or  
390 SBF/MBFs in basal fungi and we have not reached the limit of homology detection.

### 391 **Phylogenetic-based classification of protein homologs in sub-families.**

392 A phylogenetic analysis and classification was built in four stages. In the first stage,  
393 we used MAFFT-L-INS-i (-maxiterate 1000) to align the sequences of eukaryotic  
394 protein family members (Katoh and Standley, 2013). We then used probabilistic  
395 alignment masking using ZORRO (Wu et al., 2012) to create different datasets with  
396 varying score thresholds. Next, we used ProtTest 3 to determine the empirical  
397 amino-acid evolutionary model that best fit each of our protein datasets using  
398 several criteria: Akaike Information Criterion, corrected Akaike Information Criterion,  
399 Bayesian Information Criterion and Decision Theory (Darriba et al., 2011). Last, for  
400 each dataset and its best-fitting model, we ran different phylogenetic programs that  
401 use maximum-likelihood methods with different algorithmic approximations (RAxML  
402 and PhyML) and Bayesian inference methods (PhyloBayes-MPI) to reconstruct the  
403 phylogenetic relationships between proteins.

404

405

406 For RAxML analyses, the best likelihood tree was obtained from five independent  
407 maximum likelihood runs started from randomized parsimony trees using the  
408 empirical evolutionary model provided by ProtTest. We assessed branch support via  
409 rapid bootstrapping (RBS) with 100 pseudo-replicates. PhyML 3.0 phylogenetic trees  
410 were obtained from five independent randomized starting neighbor-joining trees  
411 (RAND) using the best topology from both NNI and SPR moves. Non-parametric  
412 Shimodaira-Hasegawa-like approximate likelihood ratio tests (SH-aLRTs) and  
413 parametric *à la Bayes* aLRTs (aBayes) were calculated to determine branch support  
414 from two independent PhyML 3.0 runs. For Bayesian inference we used PhyloBayes

415 (rather than the more frequently used MrBayes) because it allows for site-specific  
416 amino-acid substitution frequencies, which better models the level of heterogeneity  
417 seen in real protein data (Lartillot and Philippe, 2004; Lartillot et al., 2009). We  
418 performed Phylobayes analyses by running three independent chains under CAT and  
419 the exchange rate provided by ProtTest 3 (e.g. CAT-LG), four discrete gamma  
420 categories, and with sampling every 10 cycles. Proper mixing was initially confirmed  
421 with Tracer v1.6 (Rambaut et al., 2014). The first 1000 samples were discarded as  
422 burn-in, and convergence was assessed using bipartition frequencies and summary  
423 statistics provided by bpcomp and tracecomp from Phylobayes. These were visually  
424 inspected with an R version of AWTY (<https://github.com/danlwarren/RWTY>)  
425 (Nylander et al., 2008). The best phylogenies are shown in Figure 3-figure  
426 supplement 1-5 and Figure 5-figure supplement 1-3, and were used to tentatively  
427 classify sequences into sub-families and create Figures 2-5.

428

429 We note that the confidence of each node in the phylogenetic trees was assessed  
430 using multiple, but complementary support metrics: (1) posterior probability for the  
431 Bayesian inference, (2) rapid bootstrap support (Stamatakis, 2006; Stamatakis et  
432 al., 2008) for RAxML, and (3) non-parametric Shimodaira-Hasegawa-like  
433 approximate likelihood ratio tests (SH-aLRTs) and parametric *à la Bayes* aLRTs  
434 (aBayes) for PhyML. These different support metrics complement each other in their  
435 advantages and drawbacks. SH-aLRT is conservative enough to avoid high false  
436 positive rates but performs better compared to bootstrapping (Guindon et al., 2010;  
437 Simmons and Norton, 2014). aBayes is powerful compared to non-parametric tests,  
438 but has a tendency to increase false-positive rates under serious model violations,  
439 something that can be balanced with SH-aLRTs (Anisimova and Gascuel, 2006;  
440 Anisimova et al., 2011).

441

#### 442 **Strain construction:**

443

444 Our *CLN2pr-GFP-CLN2PEST* constructs were all derived from pLB02-0mer (described  
445 in (Bai et al., 2010) and obtained from Lucy Bai). To create pLB02-CLN2, a synthetic  
446 DNA fragment (IDT, Coralville, IA) encompassing a region of the *CLN2* promoter  
447 from 1,130 bp to 481 bp upstream of the *CLN2* ORF was digested with BamHI and  
448 SphI and ligated into pLB02-0mer digested with the same enzymes. To create  
449 pLB02-E2F, which contains E2F binding sites, the same procedure was applied to a

450 version of the promoter fragment in which the SCBs at 606bp, 581bp, and 538bp  
451 upstream of the ORF were replaced with the E2F binding site consensus sequence  
452 GCGCGAAA (Thalmeier et al., 1989). All these plasmids were linearized at the BbsI  
453 restriction site in the *CLN2* promoter and transformed. Both *swi4Δ* and *mbp1Δ*  
454 strains containing pLB02-0mer, pLB02-Cln2, pLB02-E2F fluorescent expression  
455 reporters were produced via mating lab stocks using standard methods. JE103 was a  
456 kind gift from Dr. Jennifer Ewald. Plasmids and strains are listed in Supplementary  
457 File 1B and 1C, respectively.

#### 458 **Imaging and analysis:**

459  
460 Imaging proceeded essentially as described in Bean *et al.*, 2006. Briefly, early log-  
461 phase cells were pre-grown in SCD and gently sonicated and spotted onto a SCD  
462 agarose pad (at 1.5%), which was inverted onto a coverslip. This was incubated on a  
463 heated stage on a Zeiss Observer Z.1 while automated imaging occurred (3 minute  
464 intervals, 100-300 ms fluorescence exposures). Single-cell time-lapse fluorescence  
465 intensity measurements were obtained using software described in (Doncic and  
466 Skotheim, 2013; Doncic et al., 2011), and oscillation amplitudes were obtained  
467 manually from the resulting traces. The single-cell fluorescence intensity traces used  
468 mean cellular intensity with the median intensity of the entire field of view  
469 subtracted, to control for any fluctuations in fluorescent background. The resulting  
470 measurements were analyzed in R.

471

#### 472 **ACKNOWLEDGEMENTS**

473 We thank F. Cross and A. Robinson-Mosher for extensive discussions, and R. Gordan,  
474 J. Heitman, D. Lew, J. Nevins, S. Rubin for critical comments on the manuscript. We  
475 thank J. Stajich for providing access to the Bioinformatics cluster at the Institute for  
476 Integrative Genome Biology at UC Riverside supported by the College of Natural and  
477 Agricultural Sciences, the National Science Foundation, and Alfred P Sloan  
478 Foundation.

#### 479 **References:**

480  
481 Adl, S.M., Simpson, A.G.B., Lane, C.E., Lukeš, J., Bass, D., Bowser, S.S., Brown,  
482 M.W., Burki, F., Dunthorn, M., Hampl, V., et al. (2012). The revised classification of  
483 eukaryotes. *Journal of Eukaryotic Microbiology* 59, 429–493.

- 484 Andrews, B.J., and Moore, L. (1992). Mutational analysis of a DNA sequence involved  
485 in linking gene expression to the cell cycle. *Biochem. Cell Biol.* *70*, 1073–1080.
- 486 Anisimova, M., and Gascuel, O. (2006). Approximate likelihood-ratio test for  
487 branches: A fast, accurate, and powerful alternative. *Systematic Biology* *55*, 539–  
488 552.
- 489 Anisimova, M., Gil, M., Dufayard, J.-F., Dessimoz, C., and Gascuel, O. (2011).  
490 Survey of branch support methods demonstrates accuracy, power, and robustness of  
491 fast likelihood-based approximation schemes. *Systematic Biology* *60*, 685–699.
- 492 Aravind, L., and Koonin, E.V. (1999). DNA-binding proteins and evolution of  
493 transcription regulation in the archaea. *Nucleic Acids Res* *27*, 4658–4670.
- 494 Aravind, L., Anantharaman, V., Balaji, S., Babu, M.M., and Iyer, L.M. (2005). The  
495 many faces of the helix-turn-helix domain: Transcription regulation and beyond\*.  
496 *FEMS Microbiol Rev* *29*, 231–262.
- 497 Bai, L., Charvin, G., Siggia, E.D., and Cross, F.R. (2010). Nucleosome-Depleted  
498 Regions in Cell-Cycle-Regulated Promoters Ensure Reliable Gene Expression in Every  
499 Cell Cycle. *Dev Cell* *18*, 544–555.
- 500 Baker, C.R., Booth, L.N., Sorrells, T.R., and Johnson, A.D. (2012). Protein  
501 modularity, cooperative binding, and hybrid regulatory states underlie transcriptional  
502 network diversification. *Cell* *151*, 80–95.
- 503 Bertoli, C., Skotheim, J.M., and de Bruin, R.A.M. (2013). Control of cell cycle  
504 transcription during G1 and S phases. *Nat Rev Mol Cell Biol* *14*, 518–528.
- 505 Brick, D.J., Burke, R.D., Schiff, L., and Upton, C. (1998). Shope fibroma virus RING  
506 finger protein N1R binds DNA and inhibits apoptosis. *Virology* *249*, 42–51.
- 507 Brown, V., Sabina, J., and Johnston, M. (2009). Specialized Sugar Sensing in Diverse  
508 Fungi. *Curr Biol*.
- 509 Cao, L., Chen, F., Yang, X., Xu, W., Xie, J., and Yu, L. (2014). Phylogenetic analysis  
510 of CDK and cyclin proteins in premetazoan lineages. *BMC Evol Biol* *14*, 10.
- 511 Cao, L., Peng, B., Yao, L., Zhang, X., Sun, K., Yang, X., and Yu, L. (2010). The  
512 ancient function of RB-E2F pathway: insights from its evolutionary history. *Biol*  
513 *Direct* *5*, 55–.
- 514 Cavalier-Smith, T. (1999). Principles of Protein and Lipid Targeting in Secondary  
515 Symbiogenesis: Euglenoid, Dinoflagellate, and Sporozoan Plastid Origins and the  
516 Eukaryote Family Tree. *Journal of Eukaryotic Microbiology* *46*, 347–366.
- 517 Costanzo, M., Nishikawa, J.L., Tang, X., Millman, J.S., Schub, O., Breitkreuz, K.,  
518 Dewar, D., Rupes, I., Andrews, B., and Tyers, M. (2004). CDK activity antagonizes  
519 Whi5, an inhibitor of G1/S transcription in yeast. *Cell* *117*, 899–913.
- 520 Coudreuse, D., and Nurse, P. (2010). Driving the cell cycle with a minimal CDK  
521 control network. *Nature* *468*, 1074–1079.

- 522 Cross, F.R., Buchler, N.E., and Skotheim, J.M. (2011). Evolution of networks and  
523 sequences in eukaryotic cell cycle control. *Philosophical Transactions of the Royal*  
524 *Society B: Biological Sciences* 366, 3532–3544.
- 525 Cuomo, C.A., Desjardins, C.A., Bakowski, M.A., Goldberg, J., Ma, A.T., Becnel, J.J.,  
526 Didier, E.S., Fan, L., Heiman, D.I., Levin, J.Z., et al. (2012). Microsporidian genome  
527 analysis reveals evolutionary strategies for obligate intracellular growth. *Genome Res*  
528 22, 2478–2488.
- 529 Dacks, J.B., and Field, M.C. (2007). Evolution of the eukaryotic membrane-trafficking  
530 system: origin, tempo and mode. *J Cell Sci* 120, 2977–2985.
- 531 Darriba, D., Taboada, G.L., Doallo, R., and Posada, D. (2011). ProtTest 3: fast  
532 selection of best-fit models of protein evolution. *Bioinformatics* 27, 1164–1165.
- 533 de Bruin, R.A.M., McDonald, W.H., Kalashnikova, T.I., Yates, J., and Wittenberg, C.  
534 (2004). Cln3 activates G1-specific transcription via phosphorylation of the SBF bound  
535 repressor Whi5. *Cell* 117, 887–898.
- 536 DeCaprio, J.A. (2009). How the Rb tumor suppressor structure and function was  
537 revealed by the study of Adenovirus and SV40. *Virology* 384, 274–284.
- 538 Doncic, A., and Skotheim, J.M. (2013). Feedforward Regulation Ensures Stability and  
539 Rapid Reversibility of a Cellular State. *Mol Cell*.
- 540 Doncic, A., Falleur-Fettig, M., and Skotheim, J.M. (2011). Distinct interactions select  
541 and maintain a specific cell fate. *Mol Cell* 43, 528–539.
- 542 Doonan, J.H., and Kitsios, G. (2009). Functional evolution of cyclin-dependent  
543 kinases. *Mol Biotechnol* 42, 14–29.
- 544 Eddy, S.R. (2011). Accelerated profile HMM searches. *PLoS Comput Biol* 7,  
545 e1002195.
- 546 Eichinger, L., Pachebat, J.A., Glöckner, G., Rajandream, M.-A., Sucgang, R.,  
547 Berriman, M., Song, J., Olsen, R., Szafranski, K., Xu, Q., et al. (2005). The genome  
548 of the social amoeba *Dictyostelium discoideum*. *Nature* 435, 43–57.
- 549 Eme, L., Trilles, A., Moreira, D., and Brochier-Armanet, C. (2011). The phylogenomic  
550 analysis of the anaphase promoting complex and its targets points to complex and  
551 modern-like control of the cell cycle in the last common ancestor of eukaryotes. *BMC*  
552 *Evol Biol* 11, 265.
- 553 Fang, S.-C., de los Reyes, C., and Umen, J.G. (2006). Cell size checkpoint control by  
554 the retinoblastoma tumor suppressor pathway. *PLoS Genet* 2, e167.
- 555 Finn, R.D., Bateman, A., Clements, J., Coggill, P., Eberhardt, R.Y., Eddy, S.R., Heger,  
556 A., Hetherington, K., Holm, L., Mistry, J., et al. (2014). Pfam: the protein families  
557 database. *Nucleic Acids Res* 42, D222–D230.
- 558 Finn, R.D., Clements, J., and Eddy, S.R. (2011). HMMER web server: interactive  
559 sequence similarity searching. *Nucleic Acids Res* 39, W29–W37.



- 560 Fritz-Laylin, L.K., Prochnik, S.E., Ginger, M.L., Dacks, J.B., Carpenter, M.L., Field,  
561 M.C., Kuo, A., Paredez, A., Chapman, J., Pham, J., et al. (2010). The genome of  
562 *Naegleria gruberi* illuminates early eukaryotic versatility. *Cell* *140*, 631–642.
- 563 Gajiwala, K.S., and Burley, S.K. (2000). Winged helix proteins. *Curr Opin Struct Biol*  
564 *10*, 110–116.
- 565 Gasch, A.P., Moses, A.M., Chiang, D.Y., Fraser, H.B., Berardini, M., and Eisen, M.B.  
566 (2004). Conservation and evolution of cis-regulatory systems in ascomycete fungi.  
567 *PLoS Biol* *2*, e398.
- 568 Gordân, R., Murphy, K.F., McCord, R.P., Zhu, C., Vedenko, A., and Bulyk, M.L.  
569 (2011). Curated collection of yeast transcription factor DNA binding specificity data  
570 reveals novel structural and gene regulatory insights. *Genome Biol* *12*, R125.
- 571 Guindon, S., Dufayard, J.-F., Lefort, V., Anisimova, M., Hordijk, W., and Gascuel, O.  
572 (2010). New algorithms and methods to estimate maximum-likelihood phylogenies:  
573 assessing the performance of PhyML 3.0. *Systematic Biology* *59*, 307–321.
- 574 Gunbin, K.V., Suslov, V.V., Turnaev, I.I., Afonnikov, D.A., and Kolchanov, N.A.  
575 (2011). Molecular evolution of cyclin proteins in animals and fungi. *BMC Evol Biol* *11*,  
576 224.
- 577 Guo, Z., and Stiller, J.W. (2004). Comparative genomics of cyclin-dependent kinases  
578 suggest co-evolution of the RNAP II C-terminal domain and CTD-directed CDKs. *BMC*  
579 *Genomics* *5*, 69.
- 580 Hallmann, A. (2009). Retinoblastoma-related proteins in lower eukaryotes. *Commun*  
581 *Integr Biol* *2*, 538–544.
- 582 Harashima, H., Dissmeyer, N., and Schnittger, A. (2013). Cell cycle control across  
583 the eukaryotic kingdom. *Trends Cell Biol* *23*, 345–356.
- 584 Hasan, M.M., Brocca, S., Sacco, E., Spinelli, M., Papaleo, E., Lambrughini, M.,  
585 Alberghina, L., and Vanoni, M. (2013). A comparative study of Whi5 and  
586 retinoblastoma proteins: from sequence and structure analysis to intracellular  
587 networks. *Front Physiol* *4*, 315.
- 588 Huang, D., Kaluarachchi, S., Van Dyk, D., Friesen, H., Sopko, R., Ye, W., Bastajian,  
589 N., Moffat, J., Sassi, H., Costanzo, M., et al. (2009). Dual regulation by pairs of  
590 cyclin-dependent protein kinases and histone deacetylases controls G1 transcription  
591 in budding yeast. *PLoS Biol* *7*, e1000188.
- 592 Iyer, L.M., Koonin, E.V., and Aravind, L. (2002). Extensive domain shuffling in  
593 transcription regulators of DNA viruses and implications for the origin of fungal  
594 APSES transcription factors. *Genome Biol* *3*, RESEARCH0012.
- 595 Johnson, L.S., Eddy, S.R., and Portugaly, E. (2010). Hidden Markov model speed  
596 heuristic and iterative HMM search procedure. *BMC Bioinformatics* *11*, 431.
- 597 Katoh, K., and Standley, D.M. (2013). MAFFT Multiple Sequence Alignment Software  
598 Version 7: Improvements in Performance and Usability. *Mol Biol Evol* *30*, 772–780.

- 599 Koonin, E.V., Senkevich, T.G., and Dolja, V.V. (2006). The ancient Virus World and  
600 evolution of cells. *Biol Direct* 1, 29.
- 601 Lartillot, N., and Philippe, H. (2004). A Bayesian mixture model for across-site  
602 heterogeneities in the amino-acid replacement process. *Mol Biol Evol* 21, 1095–1109.
- 603 Lartillot, N., Lepage, T., and Blanquart, S. (2009). PhyloBayes 3: a Bayesian  
604 software package for phylogenetic reconstruction and molecular dating.  
605 *Bioinformatics* 25, 2286–2288.
- 606 Lavoie, H., Hogues, H., and Whiteway, M. (2009). Rearrangements of the  
607 transcriptional regulatory networks of metabolic pathways in fungi. *Curr Opin*  
608 *Microbiol* 12, 655–663.
- 609 Liu, J., and Kipreos, E.T. (2000). Evolution of cyclin-dependent kinases (CDKs) and  
610 CDK-activating kinases (CAKs): differential conservation of CAKs in yeast and  
611 metazoa. *Mol Biol Evol* 17, 1061–1074.
- 612 Liu, J., Huang, J., Zhao, Y., Liu, H., Wang, D., Yang, J., Zhao, W., Taylor, I.A., and  
613 Peng, Y.-L. (2015). Structural basis of DNA recognition by PCG2 reveals a novel DNA  
614 binding mode for winged helix-turn-helix domains. *Nucleic Acids Res* 43, 1231–1240.
- 615 Ma, Z., Wu, Y., Jin, J., Yan, J., Kuang, S., Zhou, M., Zhang, Y., and Guo, A.-Y.  
616 (2013). Phylogenetic analysis reveals the evolution and diversification of cyclins in  
617 eukaryotes. *Molecular Phylogenetics and Evolution* 66, 1002–1010.
- 618 Merchant, S.S., Prochnik, S.E., Vallon, O., Harris, E.H., Karpowicz, S.J., Witman,  
619 G.B., Terry, A., Salamov, A., Fritz-Laylin, L.K., Maréchal-Drouard, L., et al. (2007).  
620 The *Chlamydomonas* genome reveals the evolution of key animal and plant  
621 functions. *Science* 318, 245–250.
- 622 Moffat, J., and Andrews, B. (2004). Late-G1 cyclin-CDK activity is essential for  
623 control of cell morphogenesis in budding yeast. *Nat Cell Biol* 6, 59–66.
- 624 Murray, A.W., and Kirschner, M.W. (1989). Cyclin synthesis drives the early  
625 embryonic cell cycle. *Nature* 339, 275–280.
- 626 Nasmyth, K. (1995). Evolution of the cell cycle. *Philos Trans R Soc Lond, B, Biol Sci*  
627 349, 271–281.
- 628 Nasmyth, K., and Dirick, L. (1991). The role of SWI4 and SWI6 in the activity of G1  
629 cyclins in yeast. *Cell* 66, 995–1013.
- 630 Nutiu, R., Friedman, R.C., Luo, S., Khrebtukova, I., Silva, D., Li, R., Zhang, L.,  
631 Schroth, G.P., and Burge, C.B. (2011). Direct measurement of DNA affinity  
632 landscapes on a high-throughput sequencing instrument. *Nat Biotechnol* 29, 659–  
633 664.
- 634 Nylander, J.A.A., Wilgenbusch, J.C., Warren, D.L., and Swofford, D.L. (2008). AWTY  
635 (are we there yet?): a system for graphical exploration of MCMC convergence in  
636 Bayesian phylogenetics. *Bioinformatics* 24, 581–583.
- 637 Ogas, J., Andrews, B.J., and Herskowitz, I. (1991). Transcriptional activation of

- 638 CLN1, CLN2, and a putative new G1 cyclin (HCS26) by SWI4, a positive regulator of  
639 G1-specific transcription. *Cell* 66, 1015–1026.
- 640 Rabinovich, A., Jin, V.X., Rabinovich, R., Xu, X., and Farnham, P.J. (2008). E2F in  
641 vivo binding specificity: Comparison of consensus versus nonconsensus binding sites.  
642 *Genome Res* 18, 1763–1777.
- 643 Rambaut, A., Suchard, M.A., Xie, D., and Drummond, A.J. (2014). Tracer v1.6,  
644 Available from <http://beast.bio.edu.ac.uk/Tracer>.
- 645 Sidorova, J., and Breeden, L. (1993). Analysis of the SWI4/SWI6 protein complex,  
646 which directs G1/S-specific transcription in *Saccharomyces cerevisiae*. *Mol Cell Biol*  
647 13, 1069–1077.
- 648 Simmons, M.P., and Norton, A.P. (2014). Divergent maximum-likelihood-branch-  
649 support values for polytomies. *Molecular Phylogenetics and Evolution* 73, 87–96.
- 650 Skotheim, J.M., Di Talia, S., Siggia, E.D., and Cross, F.R. (2008). Positive feedback  
651 of G1 cyclins ensures coherent cell cycle entry. *Nature* 454, 291–296.
- 652 Stamatakis, A. (2006). RAxML-VI-HPC: maximum likelihood-based phylogenetic  
653 analyses with thousands of taxa and mixed models. *Bioinformatics* 22, 2688–2690.
- 654 Stamatakis, A., Hoover, P., and Rougemont, J. (2008). A rapid bootstrap algorithm  
655 for the RAxML Web servers. *Systematic Biology* 57, 758–771.
- 656 Stern, B., and Nurse, P. (1996). A quantitative model for the *cdc2* control of S phase  
657 and mitosis in fission yeast. *Trends Genet* 12, 345–350.
- 658 Tanay, A., Regev, A., and Shamir, R. (2005). Conservation and evolvability in  
659 regulatory networks: The evolution of ribosomal regulation in yeast. *Proc Natl Acad*  
660 *Sci USA*.
- 661 Taylor, I.A., Treiber, M.K., Olivi, L., and Smerdon, S.J. (1997). The X-ray structure of  
662 the DNA-binding domain from the *Saccharomyces cerevisiae* cell-cycle transcription  
663 factor Mbp1 at 2.1 Å resolution. *J Mol Biol* 272, 1–8.
- 664 Thalmeier, K., Synovzik, H., and Mertz, R. (1989). Nuclear factor E2F mediates basic  
665 transcription and trans-activation by E1a of the human MYC promoter. *Genes & ....*
- 666 Travesa, A., Kalashnikova, T.I., de Bruin, R.A.M., Cass, S.R., Chahwan, C., Lee, D.E.,  
667 Lowndes, N.F., and Wittenberg, C. (2013). Repression of G1/S Transcription Is  
668 Mediated via Interaction of the GTB Motifs of Nrm1 and Whi5 with Swi6. *Mol Cell Biol*  
669 33, 1476–1486.
- 670 Tsong, A.E., Tuch, B.B., Li, H., and Johnson, A.D. (2006). Evolution of alternative  
671 transcriptional circuits with identical logic. *Nature* 443, 415–420.
- 672 van den Heuvel, S., and Dyson, N.J. (2008). Conserved functions of the pRB and E2F  
673 families. *Nat Rev Mol Cell Biol* 9, 713–724.
- 674 Wang, G., Kong, H., Sun, Y., Zhang, X., Zhang, W., Altman, N., DePamphilis, C.W.,  
675 and Ma, H. (2004). Genome-wide analysis of the cyclin family in *Arabidopsis* and

- 676 comparative phylogenetic analysis of plant cyclin-like proteins. *Plant Physiol* *135*,  
677 1084–1099.
- 678 Wang, H., Carey, L.B., Cai, Y., Wijnen, H., and Futcher, B. (2009). Recruitment of  
679 Cln3 cyclin to promoters controls cell cycle entry via histone deacetylase and other  
680 targets. *PLoS Biol* *7*, e1000189.
- 681 Wu, M., Chatterji, S., and Eisen, J.A. (2012). Accounting for alignment uncertainty in  
682 phylogenomics. *PLoS ONE* *7*, e30288.
- 683 Xu, R.M., Koch, C., Liu, Y., Horton, J.R., Knapp, D., Nasmyth, K., and Cheng, X.  
684 (1997). Crystal structure of the DNA-binding domain of Mbp1, a transcription factor  
685 important in cell-cycle control of DNA synthesis. *Structure* *5*, 349–358.
- 686 Yutin, N., Wolf, Y.I., Raoult, D., and Koonin, E.V. (2009). Eukaryotic large nucleo-  
687 cytoplasmic DNA viruses: clusters of orthologous genes and reconstruction of viral  
688 genome evolution. *Viol. J.* *6*, 223.
- 689 Zheng, N., Fraenkel, E., Pabo, C.O., and Pavletich, N.P. (1999). Structural basis of  
690 DNA recognition by the heterodimeric cell cycle transcription factor E2F-DP. *Genes*  
691 *Dev* *13*, 666–674.
- 692
- 693
- 694

### A. Mammalian cell cycle network

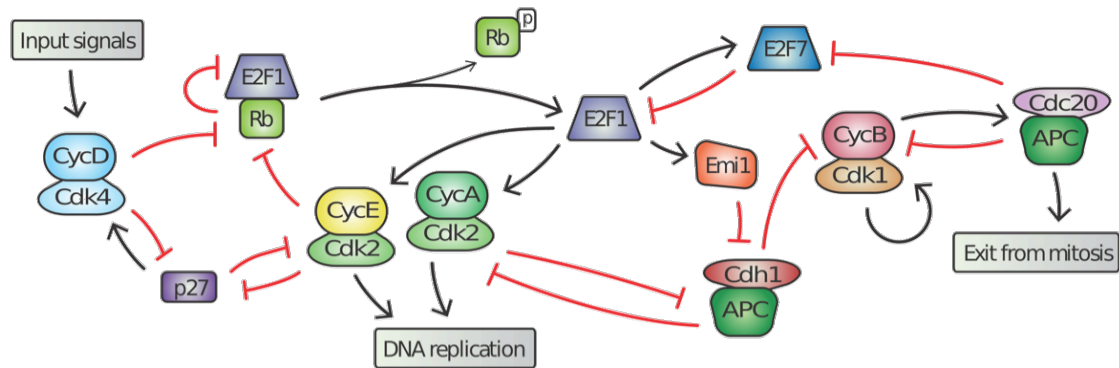

### B. Budding yeast cell cycle network

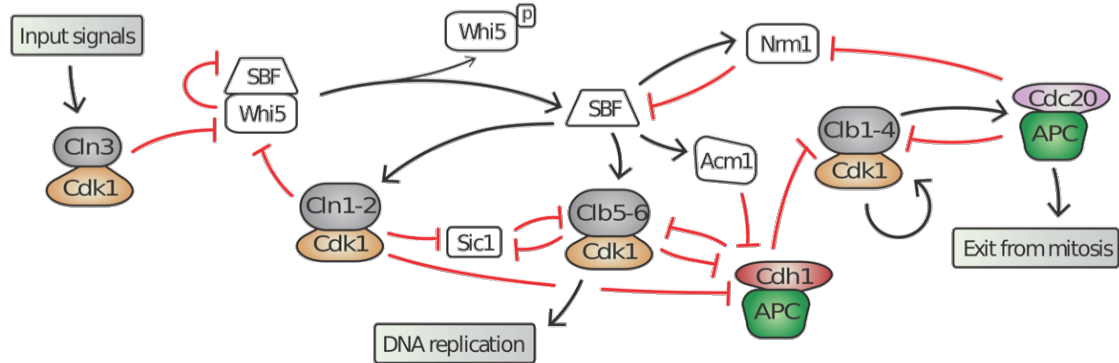

695  
696  
697  
698  
699  
700  
701  
702

**Figure 1. Topology of G1/S regulatory network in mammals and budding yeast is conserved, yet many regulators exhibit no detectable sequence homology.** Schematic diagram illustrating the extensive similarities between animal (A) and budding yeast (B) G1/S cell cycle control networks. Similar coloring denotes members of a similar family or sub-family. Fungal components colored white denote proteins with no identifiable animal orthologs.

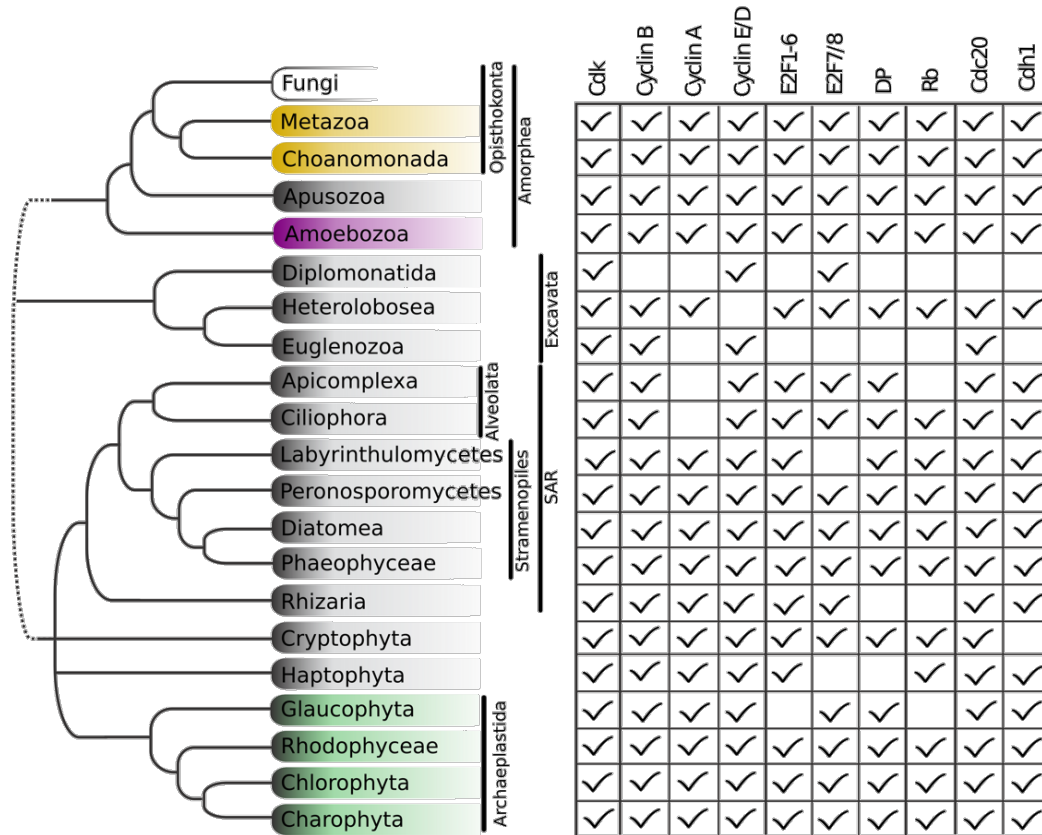

703  
704  
705  
706  
707  
708  
709  
710  
711  
712

**Figure 2. Animal and plant G1/S regulatory network was present in the last eukaryotic common ancestor.** Distribution of cell cycle regulators across the eukaryotic species tree (Adl et al., 2012). Animals (Metazoa) and yeasts (Fungi) are sister groups (Opisthokonta), and are distantly related to plants (Charophyta), which are members of the Archaeplastida. Check marks indicate the presence of at least one member of a protein family in at least one sequenced species from the corresponding group. See Figure 3 for a complete list of components in all species analyzed.

|                                  |                                     | (CycB)                       |      |      | (CycE/D) |        |        | (CycF/I/G) |    |       |      |   |
|----------------------------------|-------------------------------------|------------------------------|------|------|----------|--------|--------|------------|----|-------|------|---|
| ( <i>H. sapiens</i> )            |                                     | Cdk1-4-6                     | CycB | CycA | CycE/D   | E2F1-6 | E2F7-8 | DP         | Rb | Cdc20 | Fzr1 |   |
| Metazoa                          | <i>H. sapiens (human)</i>           | 5                            | 3    | 2    | 13       | 6      | 2      | 3          | 3  | 2     | 1    |   |
|                                  | <i>G. gallus (chicken)</i>          | 4                            | 2    | 2    | 13       | 6      | 2      | 2          | 3  | 2     | 1    |   |
|                                  | <i>D. rerio (zebrafish)</i>         | 5                            | 3    | 2    | 12       | 5      | 2      | 3          | 3  | 1     | 2    |   |
|                                  | <i>B. floridae (lancelet)</i>       | 5                            | 1    | 1    | 6        | 2      | 2      | 1          | 2  | 1     | 2    |   |
|                                  | <i>C. intestinalis (sea squirt)</i> | 5                            | 1    | 2    | 5        | 2      | 1      | 1          | 1  | 1     | 1    |   |
|                                  | <i>S. purpuratus (urchin)</i>       | 3                            | 2    | 1    | 6        | 2      | 1      | 1          | 3  | 2     | 1    |   |
|                                  | <i>L. gigantea (sea snail)</i>      | 3                            | 2    | 1    | 7        | 2      | 1      | 1          | 2  | 2     | 1    |   |
|                                  | <i>D. melanogaster (fly)</i>        | 3                            | 2    | 1    | 3        | 2      | 1      | 1          | 2  | 1     | 2    |   |
|                                  | <i>C. elegans (nematode)</i>        | 3                            | 4    | 1    | 2        | 2      | 1      | 1          | 1  | 1     | 1    |   |
|                                  | <i>N. vectensis (anemone)</i>       | 3                            | 3    | 1    | 5        | 5      | 3      | 1          | 1  | 2     | 1    |   |
|                                  | <i>A. queenslandica (sponge)</i>    | 2                            | 1    | 1    | 5        | 2      | 1      | 1          | 3  | 2     | 1    |   |
|                                  | <i>T. adhaerens (placozoa)</i>      | 3                            | 2    | 1    | 3        | 2      | 1      | 1          | 2  | 1     | 1    |   |
|                                  | Choanomonada                        | <i>Sphaeroforma arctica</i>  |      | 1    |          | 3      |        |            |    | 2     | 1    | 1 |
|                                  |                                     | <i>Capsaspora owczarzaki</i> |      | 1    | 1        | 4      | 1      | 1          | 1  | 1     | 1    | 1 |
| <i>Monosiga brevicollis</i>      |                                     | 1                            | 1    | 1    | 2        | 1      | 1      | 1          | 1  | 1     | 1    |   |
| <i>Salpingoeca rosetta</i>       |                                     | 2                            | 1    | 1    | 2        | 2      | 1      | 1          | 2  | 1     | 1    |   |
| Apusozoa                         | <i>Thecamonas trahens</i>           | 1                            | 1    | 1    | 3        | 1      | 1      | 1          | 1  | 1     | 1    |   |
| Amoebozoa                        | <i>Dictyostelium discoideum</i>     | 1                            | 1    | 1    | 1        | 1      | 1      | 1          | 1  | 1     | 1    |   |
|                                  | <i>Dictyostelium purpureum</i>      | 1                            | 1    | 1    | 1        | 1      | 1      | 1          | 1  | 1     | 1    |   |
|                                  | <i>Dictyostelium fasciculatum</i>   | 1                            | 1    | 1    | 1        | 1      | 1      | 1          | 1  | 1     | 1    |   |
|                                  | <i>Polysphondylium pallidum</i>     | 1                            | 1    | 1    |          | 1      | 2      |            | 1  | 1     | 1    |   |
|                                  | <i>Entamoeba histolytica</i>        | 6                            | 2    |      | 3        |        |        |            |    |       | 2    |   |
|                                  | <i>Entamoeba nuttalli</i>           | 6                            | 1    |      | 1        |        |        |            |    |       | 2    |   |
| Diplomonatida                    | <i>Giardia intestinalis</i>         | 2                            |      |      | 2        |        |        | 1          |    |       |      |   |
| Heterolobosea                    | <i>Naegleria gruberi</i>            | 3                            | 3    | 3    |          | 1      | 1      | 1          | 1  | 3     | 1    |   |
| Euglenozoa                       | <i>Trypanosoma brucei</i>           | 3                            | 1    |      | 2        |        |        |            |    | 3     |      |   |
|                                  | <i>Leishmania major</i>             | 3                            | 2    |      | 1        |        |        |            |    | 2     |      |   |
|                                  | <i>Leishmania donovani</i>          | 2                            | 2    |      | 1        |        |        |            |    | 2     |      |   |
| Apicomplexa                      | <i>Symbiodinium minutum</i>         | 7                            | 2    |      |          |        |        |            |    | 1     | 1    |   |
|                                  | <i>Plasmodium falciparum</i>        | 2                            |      |      |          |        |        |            |    | 1     | 1    |   |
|                                  | <i>Cryptosporidium muris</i>        | 3                            |      |      | 2        | 1      | 1      | 1          |    | 1     | 1    |   |
|                                  | <i>Toxoplasma gondii</i>            | 2                            |      |      |          |        |        |            |    | 1     | 1    |   |
| Ciliophora                       | <i>Tetrahymena thermophila</i>      | 7                            | 5    |      | 11       | 2      | 2      | 3          | 2  | 1     | 8    |   |
| Labyrinthulomycetes              | <i>Aurantiochytrium limacinum</i>   | 3                            | 1    | 1    | 3        |        |        |            | 1  | 1     | 1    |   |
|                                  | <i>Schizochytrium aggregatum</i>    | 3                            | 1    | 1    | 2        |        |        |            |    | 1     | 1    |   |
|                                  | <i>Aplanochytrium kerquelenense</i> | 3                            | 1    | 1    | 2        | 1      |        | 1          | 1  | 2     | 1    |   |
| Peronosporomycetes               | <i>Phytophthora infestans</i>       | 5                            | 1    | 1    | 3        | 1      | 1      | 1          | 1  | 1     | 1    |   |
|                                  | <i>Pythium ultimum</i>              | 1                            | 1    | 1    | 4        | 1      | 1      | 1          | 1  | 1     | 1    |   |
|                                  | <i>Hyaloperonospora parasitica</i>  | 3                            |      | 2    | 4        |        |        |            | 2  | 1     | 1    |   |
|                                  | <i>Saprolegnia parasitica</i>       | 3                            | 1    | 2    | 4        | 1      | 1      | 2          | 1  | 4     | 1    |   |
| Diatomea                         | <i>Fragilaropsis cylindrus</i>      | 2                            | 4    | 1    | 10       | 1      | 1      | 1          |    | 2     | 1    |   |
|                                  | <i>Phaeodactylum tricornutum</i>    | 2                            | 1    | 1    | 10       | 2      | 1      | 1          | 1  | 2     | 1    |   |
|                                  | <i>Thalassiosira pseudonana</i>     | 2                            | 3    | 1    | 26       | 1      | 1      | 1          | 1  | 2     | 2    |   |
| Eustigmatales                    | <i>Nannochloropsis gaditana</i>     | 3                            | 2    | 1    | 2        |        |        |            | 1  | 1     | 1    |   |
| Phaeophyceae                     | <i>Ectocarpus siliculosus</i>       | 3                            | 2    | 1    | 2        | 1      | 1      | 1          | 1  | 2     | 1    |   |
|                                  | <i>Aureococcus anophagefferens</i>  | 2                            | 2    |      | 2        | 1      |        | 1          |    | 2     | 1    |   |
| Rhizaria                         | <i>Bigelowiella natans</i>          | 1                            | 2    | 1    | 3        | 1      | 2      |            |    | 2     | 1    |   |
| Cryptophyta                      | <i>Gullardia theta</i>              | 4                            | 3    | 1    | 3        | 1      | 1      | 2          | 1  | 3     |      |   |
| Haptophyta                       | <i>Emiliania huxleyi</i>            | 2                            | 2    | 3    | 1        | 2      |        |            |    | 1     | 6    |   |
| Glaucochyta                      | <i>Cyanophora paradoxa</i>          | 1                            | 1    | 1    | 1        |        | 1      | 1          |    | 1     | 2    |   |
| Rhodophyceae                     | <i>Porphyridium cruentum</i>        | 3                            | 1    | 1    | 1        | 1      | 1      | 1          | 1  | 1     | 1    |   |
|                                  | <i>Cyanidioschyzon merolae</i>      | 2                            |      | 1    | 2        | 1      | 1      | 2          | 1  | 1     | 1    |   |
| Chlorophyta                      | <i>Ostreococcus tauri</i>           | 2                            | 1    | 1    | 2        | 1      | 1      | 1          | 1  | 1     | 1    |   |
|                                  | <i>Ostreococcus lucimarinus</i>     | 2                            | 1    | 1    | 2        | 1      | 1      | 1          | 1  | 1     | 1    |   |
|                                  | <i>Micromonas pusilla</i>           | 2                            | 1    | 1    | 2        | 1      | 1      | 1          | 1  | 1     | 1    |   |
|                                  | <i>Coccomyxa subellipsoidea</i>     | 4                            | 1    | 1    | 1        | 1      | 1      | 1          | 1  | 1     | 1    |   |
|                                  | <i>Volvox carterii</i>              | 3                            | 1    | 1    | 4        | 1      |        | 1          | 1  | 1     | 1    |   |
| <i>Chlamydomonas reinhardtii</i> | 3                                   | 1                            | 1    | 4    | 1        |        | 1      | 1          | 1  | 1     |      |   |
| Charophyta                       | <i>Physcomitrella patens</i>        | 9                            | 2    | 8    | 2        | 3      | 2      | 2          | 3  | 6     | 4    |   |
|                                  | <i>Selaginella moellendorffii</i>   | 3                            | 1    | 3    | 3        | 2      | 1      | 1          | 2  | 3     | 2    |   |
|                                  | <i>Brachypodium distachyon</i>      | 5                            | 5    | 6    | 14       | 3      | 2      | 2          | 2  | 5     | 2    |   |
|                                  | <i>Oryza sativa</i>                 | 5                            | 6    | 6    | 12       | 4      | 2      | 2          | 2  | 3     | 2    |   |
|                                  | <i>Arabidopsis thaliana</i>         | 5                            | 11   | 10   | 11       | 3      | 3      | 2          | 1  | 6     | 3    |   |

713  
714  
715  
716  
717  
718  
719  
720  
721  
722  
723  
724  
725

**Figure 3. Comparative genomic data of G1/S regulators across eukaryotes.**

We developed profile-HMMs to detect cell division cycle regulators in eukaryotic genomes. For each cell cycle regulatory family (e.g., cyclins), we used molecular phylogeny to classify eukaryotic sequences into sub-families (e.g., Cyclins B, Cyclin A, Cyclins E/D). See Methods for details and Figure 3-supplement 1 (Cyclin), Figure 3-supplement 2 (E2F/DP), Figure 3-supplement 3 (pRb), Figure 3-supplement 4 (Cdc20-family), and Figure 3-supplement 5 (CDK) for final phylogenies. Each entry lists the number of sub-family members (column) for each eukaryotic genome (row). Grey rows list the sub-family gene names in *H. sapiens* and *A. thaliana*. Additional cyclin sub-family members are listed in parentheses.

726

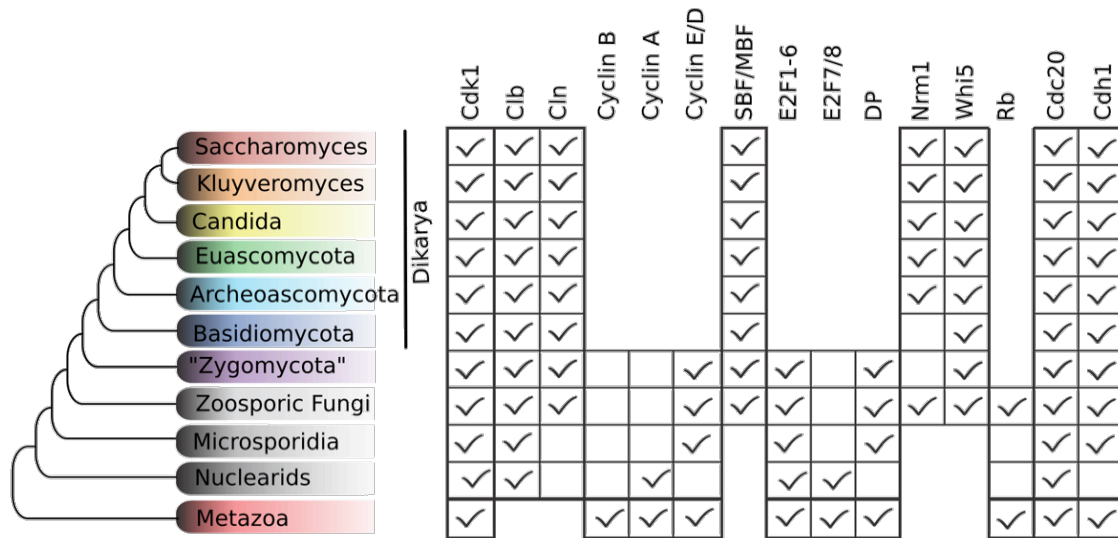

727  
728  
729  
730  
731  
732  
733  
734

**Figure 4. Fungal ancestor evolved novel G1/S regulators, which eventually replaced ancestral cyclins, transcription factors, and inhibitors in Dikarya.** Basal fungi and "Zygomycota" contain hybrid networks comprised of both ancestral and fungal specific cell cycle regulators. Check marks indicate the presence of at least one member of a protein family in at least one sequenced species from the group. See Figure 5 for a complete list of components in all fungal species analyzed.



| ( <i>S. cerevisiae</i> )              | CLB   | CLN  |   | SBF/MBF   | APSES | Xbp1   |   | Nrm1   | Whi5   |    |     |
|---------------------------------------|-------|------|---|-----------|-------|--------|---|--------|--------|----|-----|
| <i>Saccharomyces cerevisiae</i>       | 6     | 3    |   | 3         | 2     | 1      |   | 1      | 2      |    |     |
| <i>Saccharomyces mikatae</i>          | 6     | 3    |   | 3         | 2     | 1      |   | 1      | 2      |    |     |
| <i>Saccharomyces bayanus</i>          | 6     | 3    |   | 3         | 2     | 1      |   | 1      | 2      |    |     |
| <i>Candida glabrata</i>               | 6     | 3    |   | 3         | 2     | 1      |   | 1      | 1      |    |     |
| <i>Zygosaccharomyces rouxii</i>       | 3     | 3    |   | 3         | 1     | 1      |   | 1      | 1      |    |     |
| <i>Kluyveromyces waltii</i>           | 3     | 4    |   | 3         | 1     | 1      |   | 1      | 1      |    |     |
| <i>Kluyveromyces thermotolerans</i>   | 3     | 3    |   | 3         | 1     | 1      |   | 1      | 1      |    |     |
| <i>Saccharomyces kluyveri</i>         | 3     | 3    |   | 3         | 1     | 1      |   | 1      | 1      |    |     |
| <i>Ashbya gossypii</i>                | 3     | 2    |   | 3         | 1     | 1      |   | 1      | 1      |    |     |
| <i>Kluyveromyces lactis</i>           | 3     | 3    |   | 3         | 1     | 1      |   | 1      | 1      |    |     |
| <i>Wickerhamomyces anomalous</i>      | 3     | 3    |   | 3         | 2     | 1      |   | 1      | 1      |    |     |
| <i>Candida parapsilosis</i>           | 2     | 3    |   | 3         | 2     | 1      |   | 1      | 1      |    |     |
| <i>Candida albicans</i>               | 2     | 3    |   | 3         | 2     | 1      |   | 1      | 1      |    |     |
| <i>Candida tropicalis</i>             | 2     | 3    |   | 3         | 1     | 1      |   | 1      | 1      |    |     |
| <i>Candida guilliermondii</i>         | 2     | 3    |   | 3         | 2     | 1      |   | 1      | 1      |    |     |
| <i>Debaryomyces hansenii</i>          | 2     | 3    |   | 3         | 2     | 1      |   | 1      | 1      |    |     |
| <i>Candida lusitanae</i>              | 2     | 4    |   | 3         | 2     | 1      |   | 1      | 1      |    |     |
| <i>Yarrowia lipolytica</i>            | 2     | 2    |   | 2         | 2     | 1      |   | 1      | 1      |    |     |
| <i>Neurospora crassa</i>              | 2     | 1    |   | 2         | 1     | 1      | 1 | 1      | 2      |    |     |
| <i>Podospora anserina</i>             | 2     | 1    |   | 2         | 1     | 1      | 1 | 1      | 2      |    |     |
| <i>Magnaporthe grisea</i>             | 2     | 1    |   | 2         | 1     | 1      | 1 | 1      | 1      |    |     |
| <i>Fusarium graminearum</i>           | 2     | 1    |   | 2         | 1     | 1      | 1 | 1      | 2      |    |     |
| <i>Cladonia grayi</i>                 | 2     | 1    |   | 2         | 1     | 1      | 1 | 1      | 2      |    |     |
| <i>Aspergillus nidulans</i>           | 2     | 1    |   | 2         | 1     | 1      | 1 | 1      | 1      |    |     |
| <i>Coccidioides immitis</i>           | 2     | 1    |   | 2         | 1     | 1      | 1 | 1      | 2      |    |     |
| <i>Saitoella complicata</i>           | 2     | 1    |   | 2         | 1     | 1      | 1 | 1      | 2      |    |     |
| <i>Pneumocystis jirovecii</i>         | 2     | 1    |   | 2         | 1     | 1      | 1 | 1      | 2      |    |     |
| <i>Taphrina deformans</i>             | 2     | 1    |   | 2         | 1     | 1      | 1 | 1      | 2      |    |     |
| <i>Schizosaccharomyces pombe</i>      | 4     | 1    |   | 3         | 1     | 1      | 1 | 1      | 1      |    |     |
| <i>Schizosaccharomyces octosporus</i> | 4     | 1    |   | 3         | 1     | 1      | 1 | 1      | 1      |    |     |
| <i>Schizosaccharomyces japonicus</i>  | 4     | 1    |   | 3         | 1     | 1      | 1 | 1      | 1      |    |     |
| ( <i>S. pombe</i> )                   | Cdc13 | Puc1 |   | Cdc10/Res | APSES | Bqt4   |   | Whi5   |        |    |     |
| <i>Coprinopsis cinerea</i>            | 3     | 1    |   | 2         | 1     | 1      |   | 1      |        |    |     |
| <i>Laccaria bicolor</i>               | 3     | 1    |   | 2         | 1     | 1      |   | 2      |        |    |     |
| <i>Schizophyllum commune</i>          | 2     | 1    |   | 2         | 1     | 1      |   | 1      |        |    |     |
| <i>Phanerochaete chrysosporium</i>    | 2     | 1    |   | 2         | 1     | 1      |   | 2      |        |    |     |
| <i>Cryptococcus neoformans</i>        | 2     | 1    |   | 2         | 1     | 1      |   | 1      |        |    |     |
| <i>Ustilago maydis</i>                | 2     | 1    |   | 2         | 1     | 1      | 1 | 2      |        |    |     |
| <i>Puccinia graminis</i>              | 2     | 1    |   | 2         | 1     | 1      | 1 | 1      |        |    |     |
| <i>Mortierella alpina</i>             | 3     | 1    | 1 | 4         | 1     | 1      | 2 | 1      | 3      |    |     |
| <i>Mortierella verticillata</i>       | 3     | 1    | 1 | 3         | 1     | 1      | 2 | 1      | 1      |    |     |
| <i>Rhizophagus irregularis</i>        | 1     |      |   | 2         | 1     | 1      |   | 1      | 1      |    |     |
| <i>Umbelopsis ramanniana</i>          | 1     |      | 1 | 3         | 3     | 1      |   | 1      | 2      |    |     |
| <i>Lichtheimia hyalospora</i>         | 1     |      | 1 | 4         | 9     | 1      |   | 2      | 3      |    |     |
| <i>Mucor circineoloides</i>           | 1     |      |   | 4         | 6     | 2      |   | 1      | 2      |    |     |
| <i>Phycomyces blakesleeana</i>        | 1     |      |   | 4         | 6     | 1      |   | 2      | 2      |    |     |
| <i>Rhizopus oryzae</i>                | 1     |      |   | 6         | 10    | 1      |   | 2      | 1      |    |     |
| <i>Coemansia reversa</i>              | 4     |      | 1 | 2         | 1     | 1      |   | 1      | 1      |    |     |
| <i>Conidiobolus coronatus</i>         | 1     |      | 2 | 1         | 2     | 1      |   | 1      | 1      |    |     |
| <i>Allomyces macrogynus</i>           | 1     |      | 4 | 6         | 3     |        |   | 1      | 1      |    |     |
| <i>Catenaria anguillulae</i>          | 1     |      | 1 | 2         | 1     |        |   | 1      | 1      |    |     |
| <i>Gonapodya prolifera</i>            | 3     | 1    |   | 2         |       |        |   | 1      | 1      |    |     |
| <i>Piromyces sp E2</i>                | 3     | 1    |   | 1         | 2     | 1      |   | 1      | 1      |    |     |
| <i>Batrachochytrium dendrobatidis</i> | 2     | 1    |   | 3         |       |        |   | 1      | 1      |    |     |
| <i>Spizellomyces punctatus</i>        | 1     | 1    |   | 3         |       |        |   | 1      | 1      |    |     |
| <i>Rozella allomycis</i>              | 1     |      |   | 1         |       |        |   | 1      | 1      |    |     |
| <i>Encephalitozoon cuniculi</i>       | 1     |      |   | 1         |       |        |   | 1      | 1      |    |     |
| <i>Nosema ceranae</i>                 | 1     |      |   | 1         |       |        |   | 1      | 1      |    |     |
| <i>Edhazardia aedis</i>               | 1     |      |   | 1         |       |        |   | 1      | 1      |    |     |
| <i>Vittaforma corneae</i>             | 1     |      |   | 1         |       |        |   | 1      | 1      |    |     |
| <i>Nematocida parisii</i>             | 1     |      |   | 1         |       |        |   | 1      | 1      |    |     |
| <i>Fonticula alba</i>                 | 2     |      |   | 2         |       |        |   | 1      | 1      |    |     |
| <i>Thecamonas trahens</i>             |       |      | 1 | 1         | 3     |        |   | 1      | 1      |    |     |
| <i>Capsaspora owczarzaki</i>          |       |      | 1 | 1         | 4     |        |   | 1      | 1      |    |     |
| <i>H. sapiens (human)</i>             |       |      | 3 | 2         | 13    |        |   | 6      | 2      |    |     |
| ( <i>H. sapiens</i> )                 |       |      |   | CycB      | CycA  | CycE/D |   | E2F1-6 | E2F7-8 | DP | pRB |

735  
736  
737  
738  
739  
740  
741  
742  
743  
744  
745

**Figure 5. Comparative genomic data of G1/S regulators across fungi.** We developed profile-HMMs to detect fungal-specific cell division cycle regulators in eukaryotic genomes. For each cell cycle regulatory family (e.g., SBF/APSES), we used molecular phylogeny to classify eukaryotic sequences into sub-families (e.g., SBF/MBF, APSES, Xbp1, Bqt4). Corresponding table shows the number of regulators of each class for all species analyzed. See Methods for details and Figure 5-supplement 1 (SBF only), Figure 5-supplement 2 (SBF+APSES), and Figure 5-supplement 3 (Whi5) for final phylogenies. Grey rows list the sub-family gene names in *S. cerevisiae*, *S. pombe*, and *H. sapiens*

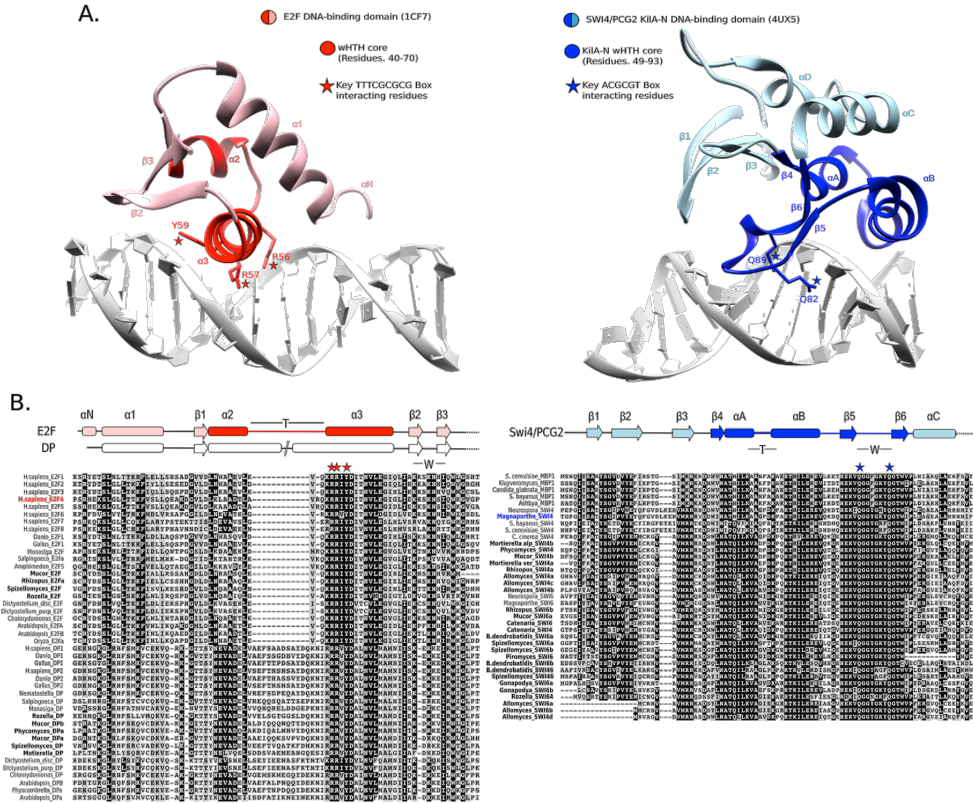

746  
747  
748  
749  
750  
751  
752  
753  
754  
755  
756  
757  
758  
759  
760  
761  
762  
763  
764

**Figure 6. E2F and SBF show incongruences in sequence, structure, and mode of DNA binding.** (A) Although both proteins share a winged helix-turn-helix (wHTH) domain, the E2F/DP and SBF/MBF superfamilies do not exhibit significant sequence identity or structural similarity to suggest a common recent evolutionary origin according to CATH or SCOP databases. Furthermore, each wHTH has a different mechanism of interaction with DNA: the arginine and tyrosine side-chains of recognition helix-3 of E2F (E2F4 from *Homo sapiens* (Zheng et al., 1999)) interact with specific CG nucleotides, whereas the glutamine side-chains of the "wing" of SBF/MBF (PCG2 from *Magnaporthe oryzae* (Liu et al., 2014)) interact with specific CG nucleotides. (B) Sequence alignment of the DNA binding domain of representative eukaryotic E2F/DP (left) and fungal SBF/MBF (right). The corresponding secondary structure is above the sequence alignment. Evolutionarily conserved residues of sequence aligned DNA binding domains are highlighted in black. Bold sequence names correspond to E2F/DP and SBF/MBF sequences from basal fungi. Colored sequence names correspond to sequences of the structures shown in panel A. PDB IDs for the structures used are shown in parentheses. W = wing; T = turn.

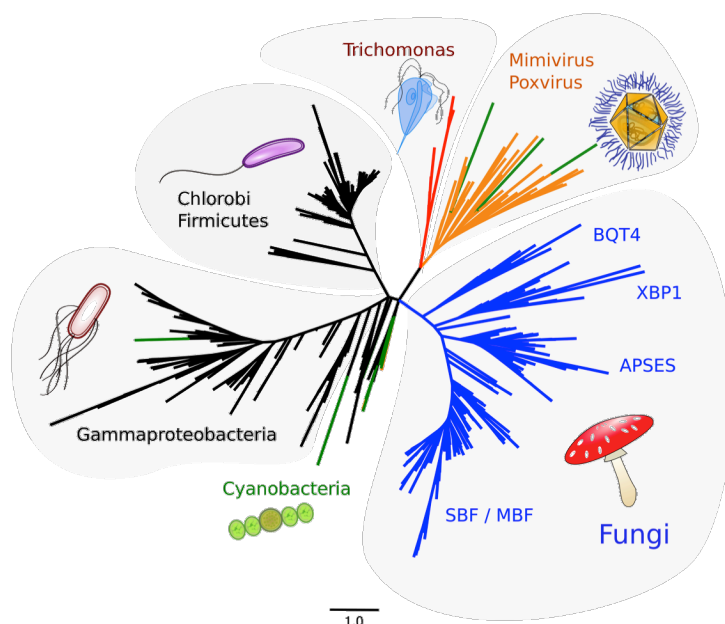

765  
766  
767  
768  
769  
770  
771  
772  
773

**Figure 7. Viral origin of yeast cell cycle transcription factor SBF.** Maximum Likelihood unrooted phylogenetic tree depicting relationships of fungal SBF-family proteins (blue), KILA-N domains in prokaryotic (black, green), and eukaryotic DNA viruses (orange, red). The particular origin of the HGT event that originated the SBF/APSES family is unclear. We found no significant rapid bootstrapping support (RBS  $\geq 80\%$ ) for internal branches. Inference was performed under GTR+G model of evolution. Scale bar in substitutions per site; (See Methods).

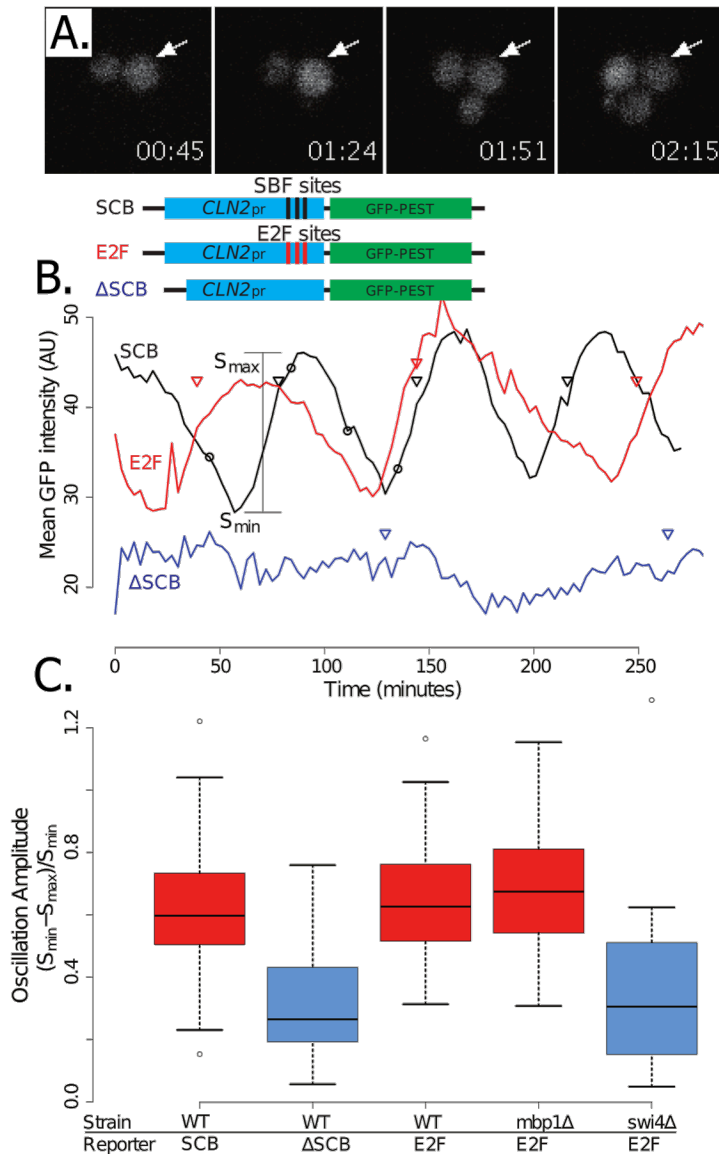

774  
775  
776  
777  
778  
779  
780  
781  
782  
783  
784  
785  
786  
787  
788  
789

**Figure 8. Yeast cell cycle transcription factor SBF can regulate cell cycle-dependent transcription via E2F binding sites** (A) Fluorescence images of cells expressing a destabilized GFP from the SBF-regulated *CLN2* promoter. (B) Oscillation of a transcriptional reporter in budding yeast. Characteristic time series of GFP expression from a *CLN2* promoter (SCB), a *CLN2* promoter where the SBF binding sites were deleted ( $\Delta$ SCB), or a *CLN2* promoter where the SBF binding sites were replaced with consensus E2F binding sites (E2F). Oscillation amplitudes were quantified by scaling the mean fluorescence intensity difference from peak to trough divided by the trough intensity  $(S_{max} - S_{min})/S_{min}$ . Circles denote time points corresponding to (b). Triangles denote budding events. (C) Distribution of oscillation amplitudes for different genotypes and GFP reporters. *swi4Δ* and *mbp1Δ* strains have deletions of the SBF and MBF DNA-binding domain subunits respectively. t-test comparisons within and across red and blue categories yield p-values  $> 0.3$  or  $< 0.01$  respectively. Boxes contain 25<sup>th</sup>, median and 75<sup>th</sup> percentiles, while whiskers extend to 1.5 times this interquartile range.

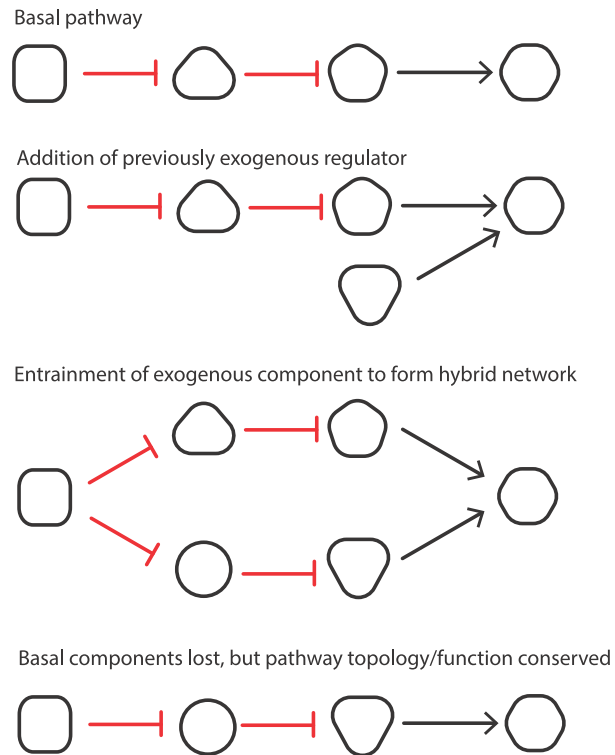

790  
791  
792  
793  
794  
795  
796  
797

**Figure 9. Punctuated evolution of a conserved regulatory network.** Evolution can replace components in an essential pathway by proceeding through a hybrid intermediate. Once established, the hybrid network can evolve dramatically and lose previously essential regulators, while sometimes retaining the original network topology.

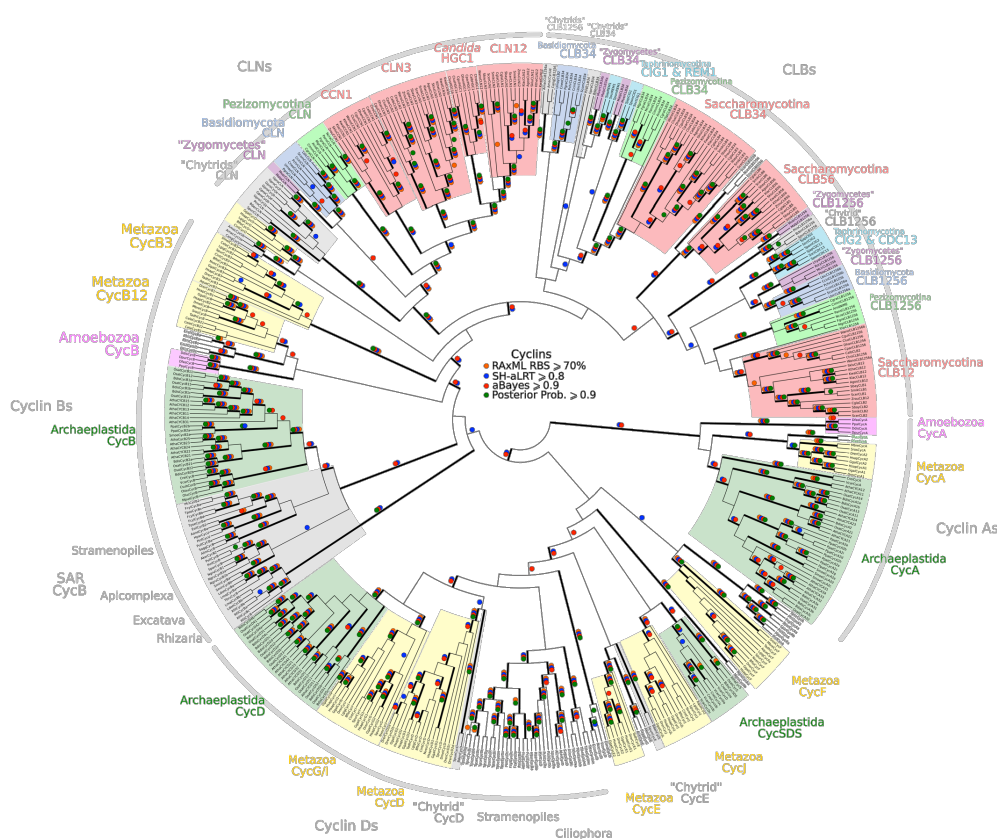

798

799

800 **Figure 3 - supplement 1: Reduced phylogeny of eukaryotic cell cycle cyclins.**

801 The cell division cycle (CDC) cyclin family consists of several sub-families with a well-  
 802 characterized cyclin box: (1) CycA (*H. sapiens*, *A. thaliana*), (2) CycB and CLB (*H.*  
 803 *sapiens*, *A. thaliana*, *S. cerevisiae*, *S. pombe*), (3) CycD (*H. sapiens*, *A. thaliana*), (4)  
 804 CycE (*H. sapiens*), and (5) CLN (*S. cerevisiae*, *S. pombe*). We combined CycA,  
 805 CycB, CycD, CycE, CLB, and CLN sequences from *H. sapiens* (10 cyclins), *A. thaliana*  
 806 (13 cyclins), *S. cerevisiae* (9 cyclins), and *S. pombe* (5 cyclins) to create a  
 807 eukaryotic CDC cyclin profile-HMM (pCYC.hmm) following the procedure outlined in  
 808 the Methods. Our HMM profile was sensitive enough to discover known, but  
 809 uncharacterized cyclin sub-families (CycO, CycF, CycG, CycI, CycJ, CycSDS) as *bona*  
 810 *fide* CDC cyclins. A domain threshold of E-20 was used to identify potential CDC  
 811 cyclin homologs. We first made a phylogeny of all cyclins to classify them. This  
 812 dataset was then manually pruned to remove long-branches and problematic  
 813 lineages. Our reduced CDC cyclin dataset has a total of 499 sequences. Columns with  
 814 the top 10% Zorro score (496 positions) were used in our alignment. Confidence at  
 815 nodes was assessed with multiple support metrics using different phylogenetic  
 816 programs under LG model of evolution (aBayes and SH-aLRT metrics with PhyML,  
 817 RBS with RAxML, Bayesian Posterior Probability with Phylobayes (23,163 sampled  
 818 trees, meandiff= 0.01, maxdiff= 0.5)). Colored dots in branches indicate  
 819 corresponding branch supports. Thick branches indicate significant support by at  
 820 least two metrics, one parametric and one non-parametric; branch support  
 821 thresholds are shown in the center of the figure; see Methods.

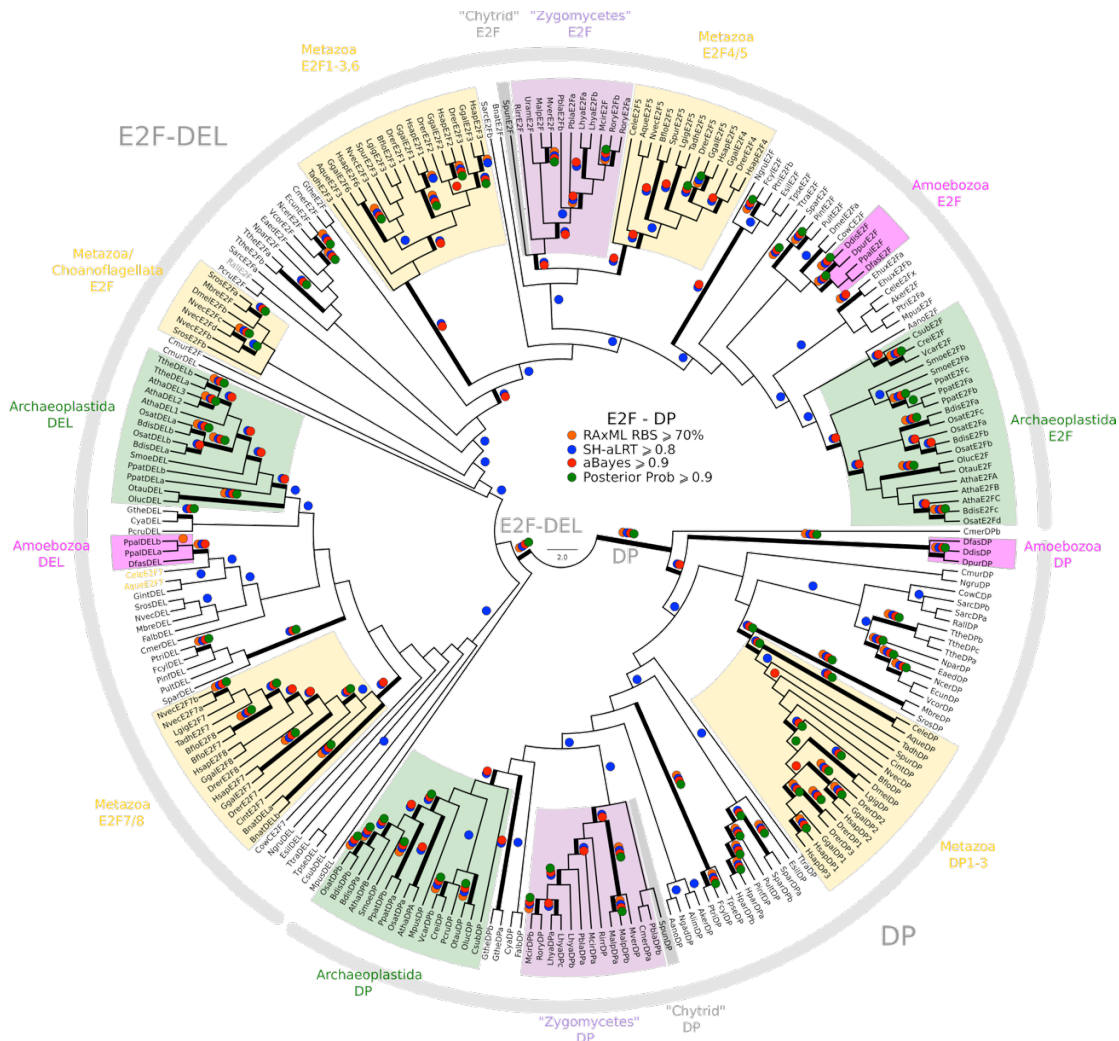

822  
823  
824  
825  
826  
827  
828  
829  
830  
831  
832  
833  
834  
835  
836  
837  
838  
839  
840  
841  
842  
843

**Figure 3 - supplement 2: Phylogeny of eukaryotic E2F/DP transcription factors.** E2F-DP is a winged helix-turn-helix DNA-binding domain that is conserved across eukaryotes (van den Heuvel and Dyson, 2008). There are three sub-families within the E2F-DP family: (1) the E2F subfamily, (2) the E2F7-8/DEL subfamily, and (3) the DP subfamily. The E2F family consists of E2F1-6 (*H. sapiens*) and E2FA-C (*A. thaliana*). The E2F7-8/DEL family consists of E2F7-8 (*H. sapiens*) and DEL1-3 (*A. thaliana*). The DP family consists of DP1-3 (*H. sapiens*) and DPA-B (*A. thaliana*). The members of E2F form heterodimers with DP, whereas the DEL family has two DNA-binding domains and does not require DP to bind DNA. We used the E2F\_TDP.hmm profile from PFAM to uncover members of the E2F/DP family across eukaryotes. A domain threshold of E-10 was used to identify potential E2F/DP homologs. Our E2F/DP dataset (pE2FDP.fasta) has 248 sequences. Columns with the top 8% Zorro score (284 positions) were used in our alignment. Confidence at nodes was assessed with multiple support metrics using different phylogenetic programs under LG model of evolution (aBayes and SH-aLRT metrics with PhyML, RBS with RAXML, Bayesian Posterior Probability with Phylobayes (53,009 sampled trees, meandiff=0.0064, maxdiff=0.18)). Colored dots in branches indicate corresponding branch supports. Thick branches indicate significant support by at least two metrics, one parametric and one non-parametric; branch support thresholds are shown in the center of the figure; see Methods.

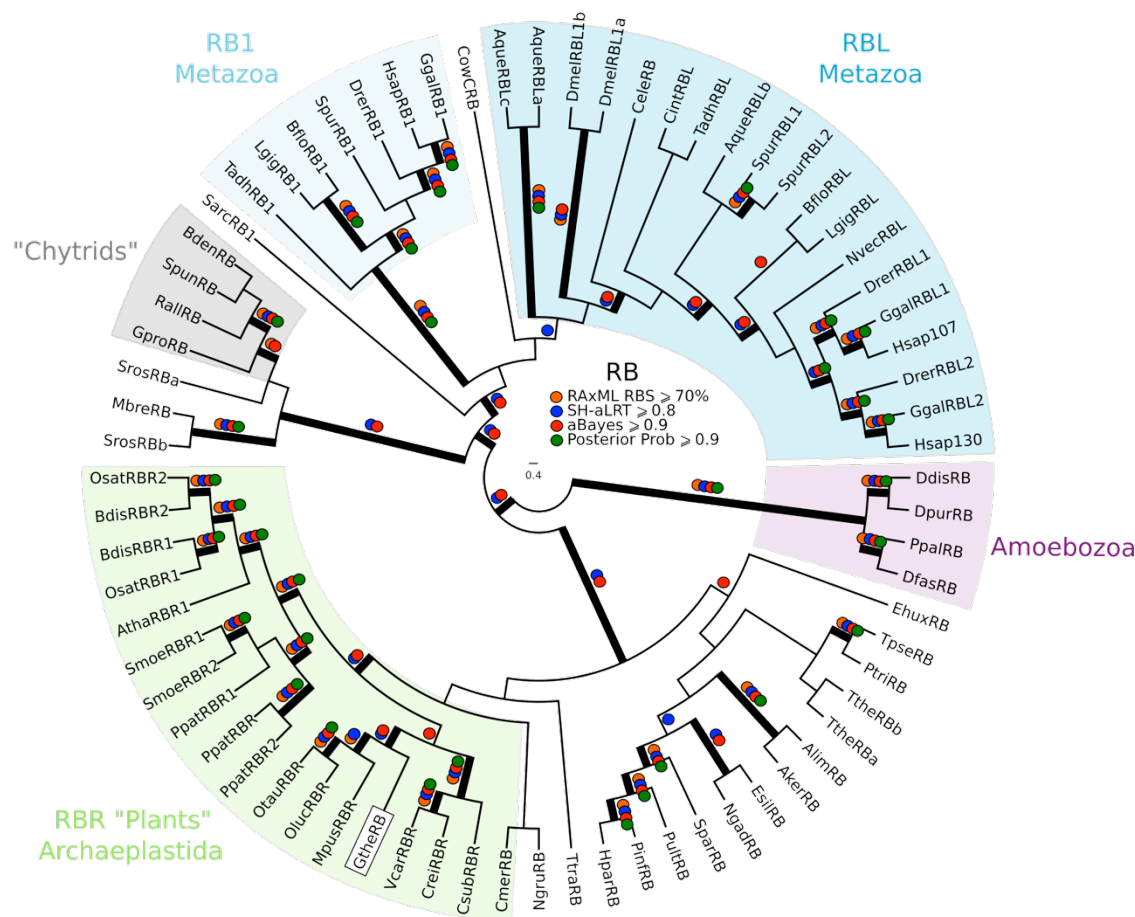

844  
845  
846  
847  
848  
849  
850  
851  
852  
853  
854  
855  
856  
857  
858  
859  
860  
861  
862  
863  
864  
865  
866

**Figure 3 - supplement 3: Phylogeny of eukaryotic Rb inhibitors.** *H. sapiens* has Rb1, RBL1 (p107), and RBL2 (p130), and *A. thaliana* has RBR1. The model fungi *S. cerevisiae* and *S. pombe* do not have any obvious retinoblastoma pocket proteins. We needed more eukaryotic sequences to create a robust HMM profile (pRb.hmm) for the pRb family. Based on the pRb sequences collected in (Hallmann, 2009), we built a profile-HMM using putative pRb homologs from *H. sapiens*, *G. gallus*, *C. intestinalis*, *D. melanogaster*, *C. elegans*, *N. vectensis*, *T. adhaerens* (metazoa); *B. dendrobatidis* (fungi); *D. discoideum*, *D. purpureum*, *T. pseudonana*, *P. tricornutum*, *N. gruberi*, *E. huxleyi* (protists); *C. merolae*, *O. tauri*, *O. lucimarinus*, *M. pusilla*, *V. carteri*, *C. reinhardtii*, *P. patens*, *S. moellendorffii*, *A. thaliana* (plants). A domain threshold of E-20 was used to identify pRb homologs. Our pRb dataset (pRb.fasta) has 72 sequences. Columns with the top 15% Zorro score (566 positions) were used in our alignment. Confidence at nodes was assessed with multiple support metrics using different phylogenetic programs under LG model of evolution (aBayes and SH-aLRT metrics with PhyML, RBS with RAXML, Bayesian Posterior Probability with Phylobayes (23,219 sampled trees, meandiff=0.0035, maxdiff=0.067)). Colored dots in branches indicate corresponding branch supports. Thick branches indicate significant support by at least two metrics, one parametric and one non-parametric; branch support thresholds are shown in the center of the figure; see Methods.



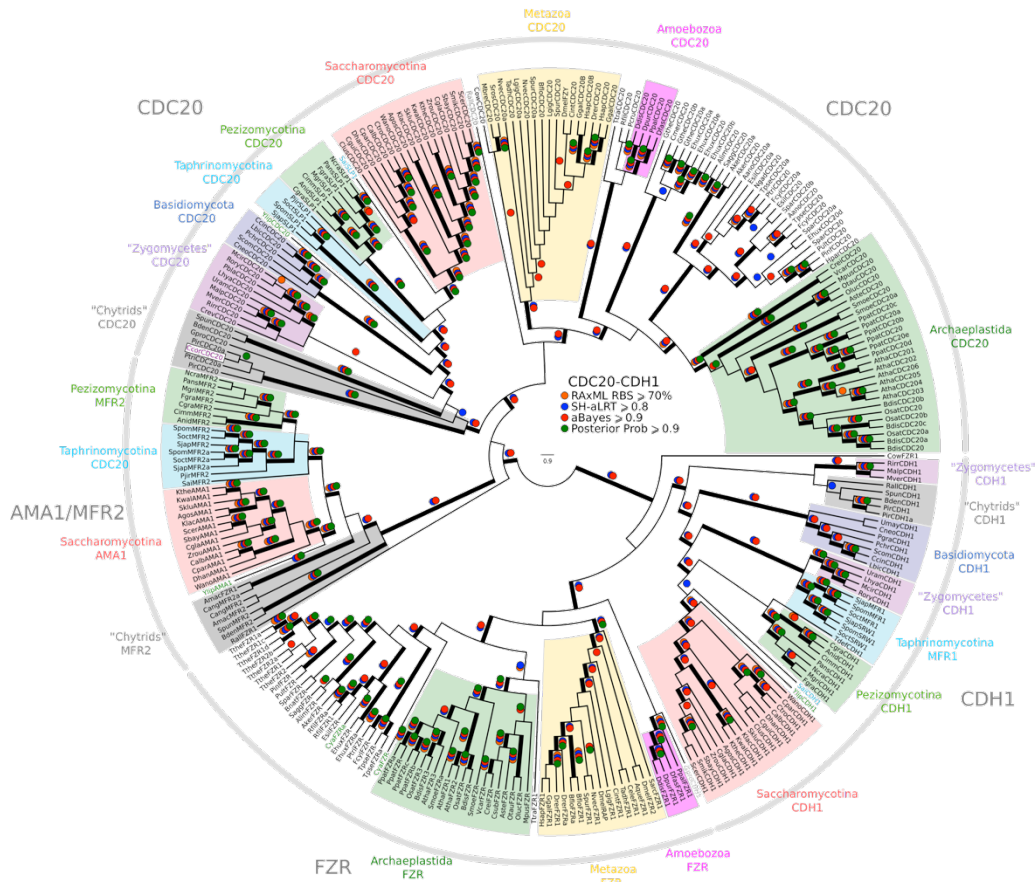

867  
868  
869  
870  
871  
872  
873  
874  
875  
876  
877  
878  
879  
880  
881  
882  
883  
884  
885

**Figure 3 - supplement 4: Reduced phylogeny of eukaryotic Cdc20-family APC regulators.** We combined CDC20 and CDH1/FZR1 sequences from *H. sapiens* (3 members), *A. thaliana* (9 members), and *S. cerevisiae* (3 members) to create a eukaryotic CDC20-family APC regulator profile-HMM (pCDC20.hmm) following the procedure outlined in the Methods. A domain threshold of E-50 was used to identify CDC20 homologs. Our pCDC20 dataset (pCDC20.fasta) has 350 sequences. This dataset was manually pruned to remove long-branches and problematic lineages. Our reduced CDC20 dataset has a total of 289 sequences. Columns with the top 20% Zorro score (608 positions) were used in our alignment. Confidence at nodes was assessed with multiple support metrics using different phylogenetic programs under LG model of evolution (aBayes and SH-aLRT metrics with PhyML, RBS with RAxML, Bayesian Posterior Probability with Phylobayes (13,638 sampled trees, meandiff=0.015, maxdiff=0.37)). Colored dots in branches indicate corresponding branch supports. Thick branches indicate significant support by at least two metrics, one parametric and one non-parametric; branch support thresholds are shown in the center of the figure; see Methods.

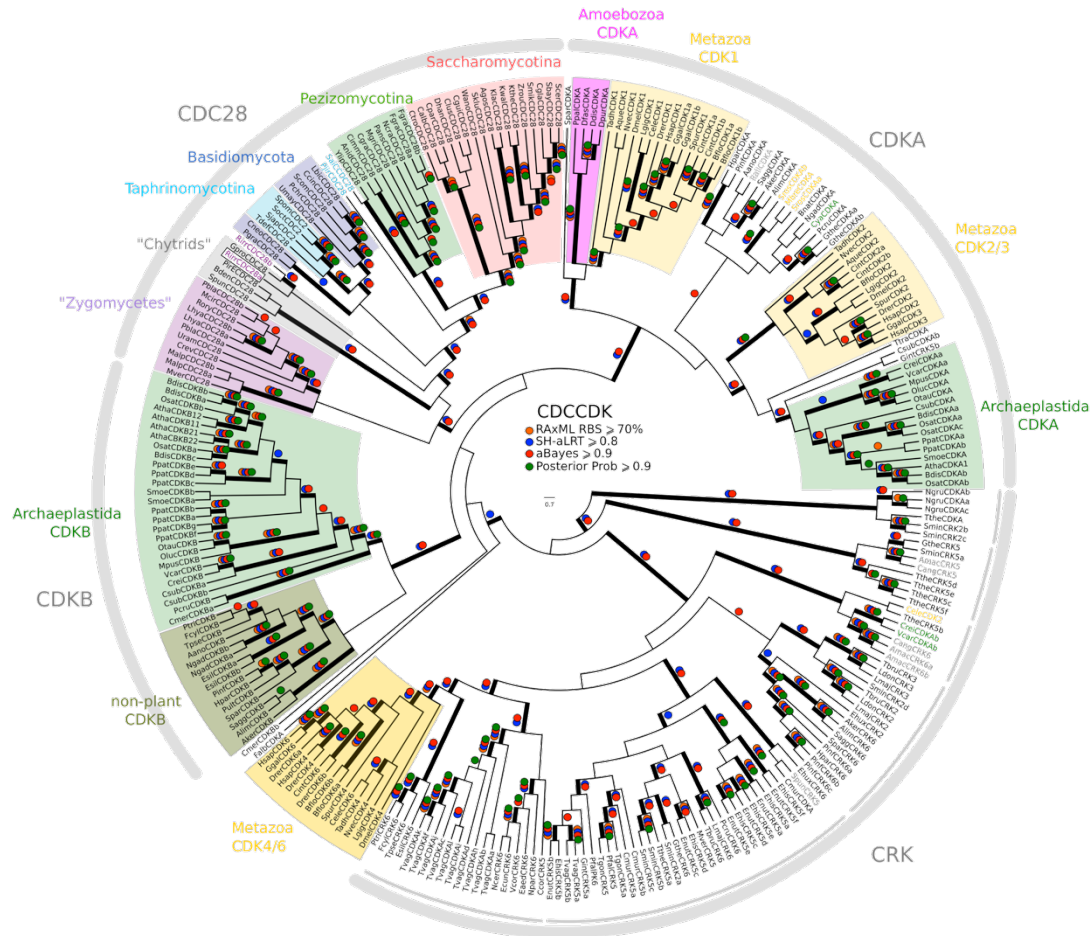

886  
887  
888  
889  
890  
891  
892  
893  
894  
895  
896  
897  
898  
899  
900  
901  
902  
903

**Figure 3 - supplement 5: Phylogeny of eukaryotic cyclin-dependent kinases.**

To create a profile-HMM (pCDCCDK.hmm) for eukaryotic cell cycle CDK, we combined Cdk1-3, Cdk4, Cdk6 sequences from *H. sapiens*, CdkA and CdkB from *A. thaliana*, Cdc28 from *S. cerevisiae*, and Cdc2 from *S. pombe*. A domain threshold of E-20 was used to identify CDK homologs. Our cell cycle CDK dataset (pCDCCDK.fasta) has 272 sequences. Columns with the top 15% Zorro score (473 positions) were used in our alignment. Confidence at nodes was assessed with multiple support metrics using different phylogenetic programs under LG model of evolution (aBayes and SH-aLRT metrics with PhyML, RBS with RAxML, Bayesian Posterior Probability with Phylobayes (28,193 sampled trees, meandiff=0.015, maxdiff=0.53)). Colored dots in branches indicate corresponding branch supports. Thick branches indicate significant support by at least two metrics, one parametric and one non-parametric; branch support thresholds are shown in the center of the figure; see Methods.

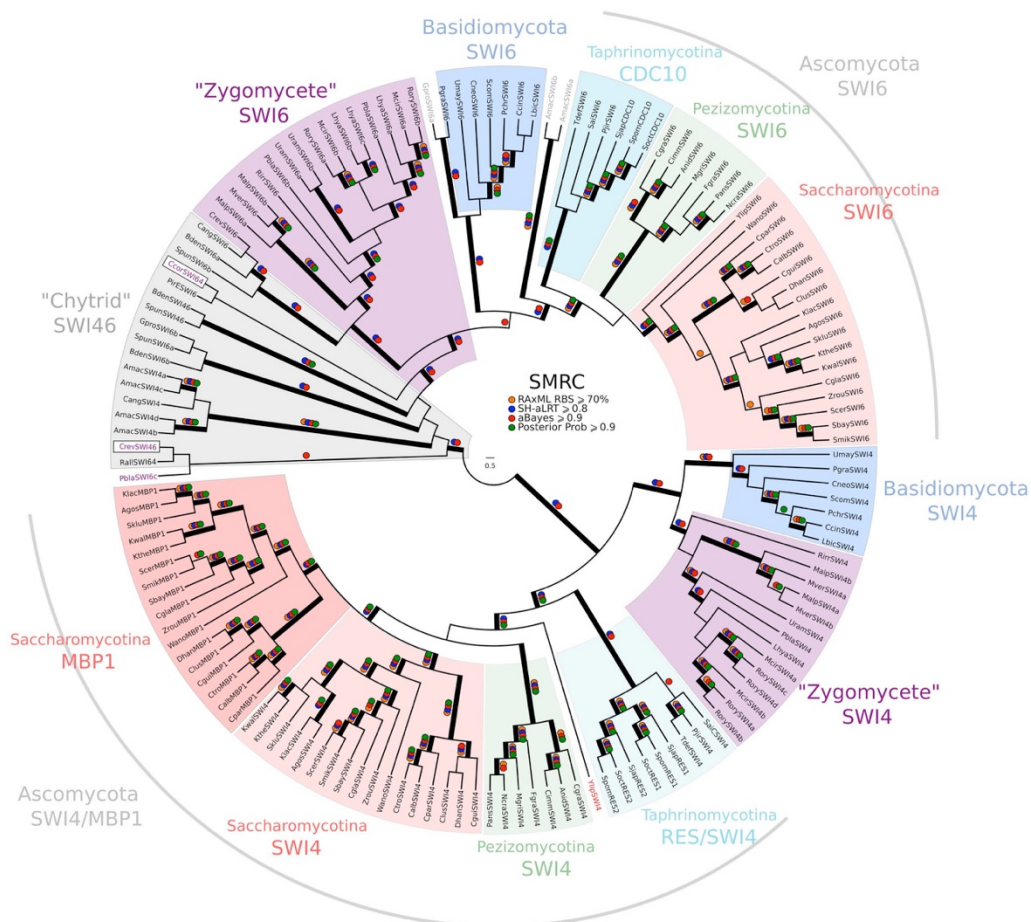

904  
905  
906  
907  
908  
909  
910  
911  
912  
913  
914  
915  
916  
917  
918  
919  
920  
921  
922

**Figure 5 - supplement 1: Phylogeny of fungal SBF transcription factors.** SBF and MBF are transcription factors that regulate G1/S transcription in budding and fission yeast. To detect SMRC (Swi4/6 Mbp1 Res1/2 Cdc10) across fungi, we built a sensitive profile-HMM (pSMRC.hmm) by combining well-characterized SMRC sequences from *S. cerevisiae*, *C. albicans*, *N. crassa*, *A. nidulans*, and *S. pombe*. A domain threshold of E-10 was used to identify SMRC homologs. Our SMRC dataset (pSMRC.fasta) has 147 sequences. Columns with the top 20% Zorro score (709 positions) were used in our alignment. Confidence at nodes was assessed with multiple support metrics using different phylogenetic programs under LG model of evolution (aBayes and SH-aLRT metrics with PhyML, RBS with RAXML, Bayesian Posterior Probability with Phylobayes (19,457 sampled trees, meandiff=0.0056, maxdiff=0.145)). Colored dots in branches indicate corresponding branch supports. Thick branches indicate significant support by at least two metrics, one parametric and one non-parametric; branch support thresholds are shown in the center of the figure; see Methods.

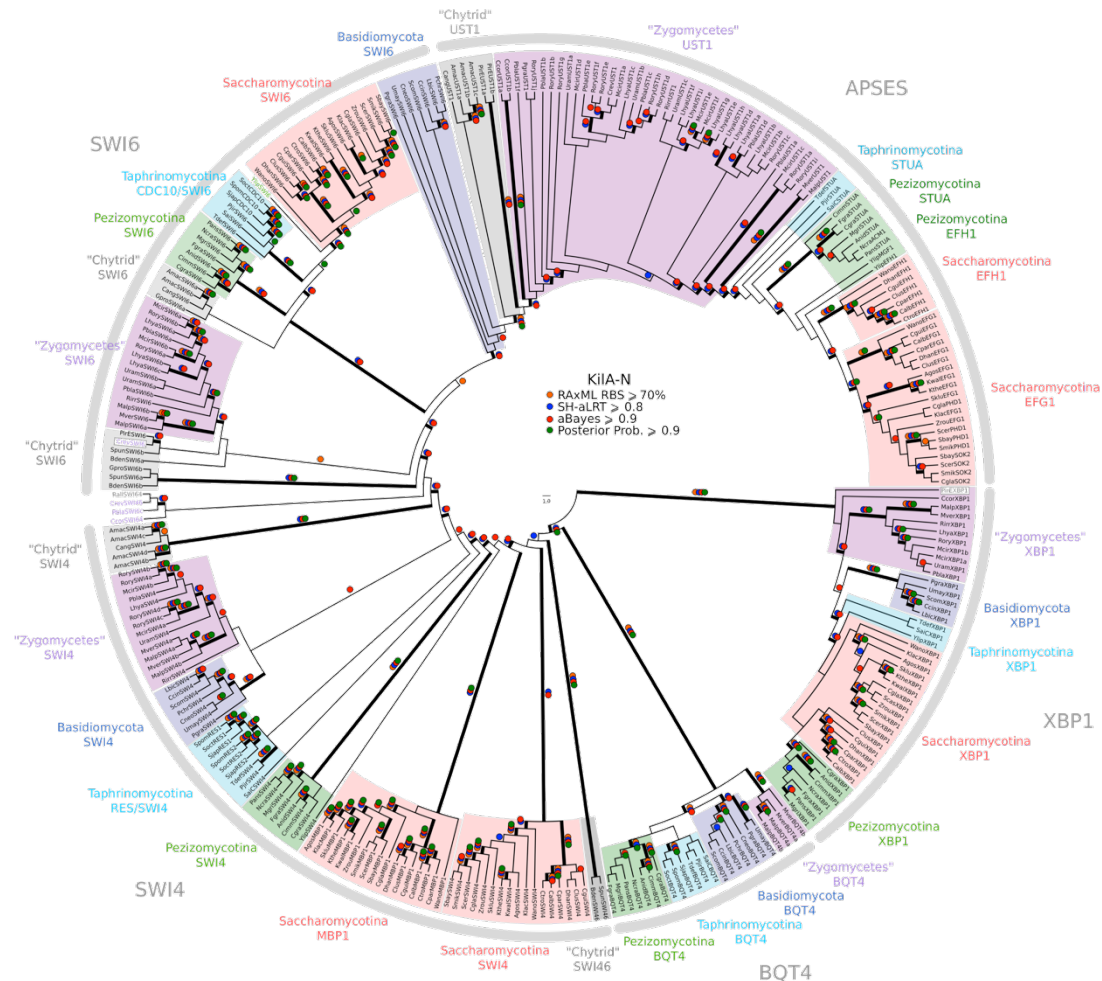

923  
924  
925  
926  
927  
928  
929  
930  
931  
932  
933  
934  
935  
936  
937  
938  
939  
940  
941  
942  
943  
944

**Figure 5 - supplement 2: Phylogeny of fungal SBF and APSES transcription factors.** SBF and APSES transcription factors (*Asm1*, *Phd1*, *Sok2*, *Efg1*, *StuA*) share a common DNA-binding domain (Kila-N), which is derived from DNA viruses. During our search for SBF and APSES homologs, we consistently detected two additional fungal sub-families with homology to Kila-N: XBP1 (family name taken from *S. cerevisiae*) and BQT4 (family name taken from *S. pombe*). To detect APSES, XBP1, and BQT4 homologs, we built profile-HMMs (APSES.hmm, XBP1.hmm, and BQT4.hmm) by combining APSES, XBP1, and BQT4 homologs from *S. cerevisiae*, *C. albicans*, *N. crassa*, *A. nidulans*, and *S. pombe*. A domain threshold of E-10 was used to identify APSES, XBP1, and BQT4 homologs. Our final dataset (pKILA.fasta) contains all fungal KILA sub-families (SBF, APSES, XBP1, BQT4) and has a total of 301 sequences. Columns with the top 10% Zorro score (447 positions) were used in our alignment. Confidence at nodes was assessed with multiple support metrics using different phylogenetic programs under LG model of evolution (aBayes and SH-aLRT metrics with PhyML, RBS with RAxML, Bayesian Posterior Probability with Phylobayes (15,251 sampled trees, meandiff=0.012, maxdiff=0.25)). Colored dots in branches indicate corresponding branch supports. Thick branches indicate significant support by at least two metrics, one parametric and one non-parametric; branch support thresholds are shown in the center of the figure; see Methods.

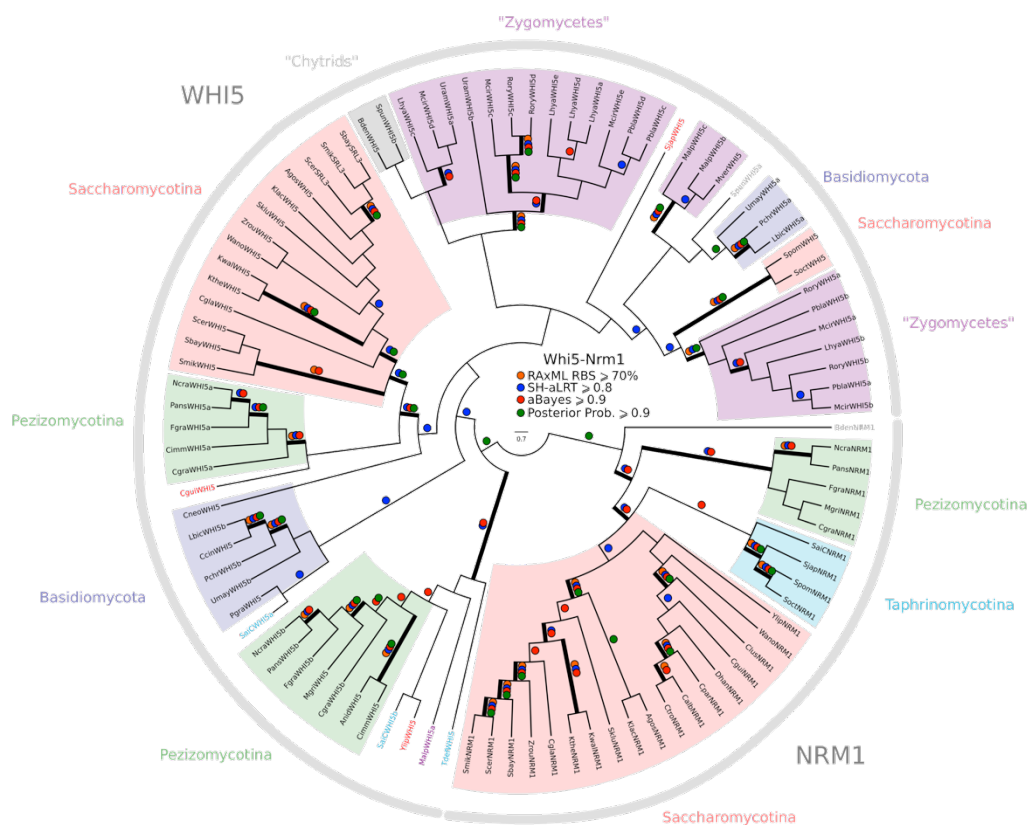

945  
946  
947  
948  
949  
950  
951  
952  
953  
954  
955  
956  
957  
958  
959  
960  
961  
962  
963  
964  
965  
966

**Figure 5 - supplement 3: Phylogeny of fungal Whi5 inhibitors.** WHI5 and NRM1 are a yeast-specific protein family that has been identified and functionally characterized across *S. cerevisiae*, *C. albicans*, and *S. pombe*. Both WHI5 and NRM1 are fast evolving proteins. There is a small conserved region of 25 amino-acids (known as the GTB domain) that is responsible for interacting with Swi6/Cdc10 (Travesa et al., 2013). Unfortunately, the Whi5.hmm profile from PFAM is unable to detect an SRL3 paralogue in *S. cerevisiae* or the NRM1 orthologues in *A. gossypii* or *C. albicans*. We built a more sensitive profile-HMM (pWHI5.hmm) by combining WHI5/NRM1 sequences across ascomycetes (including SRL3 from *Saccharomyces* genomes and NRM1 from *Candida* genomes). A domain threshold of E-05 was used to identify WHI5 homologs. Our WHI5 dataset (pWHI5.fasta) has 98 sequences. Columns with the top 15% Zorro score (260 positions) were used in our alignment. Confidence at nodes was assessed with multiple support metrics using different phylogenetic programs under the LG model of evolution (aBayes and SH-aLRT metrics with PhyML, RBS with RAxML, Bayesian Posterior Probability with Phylobayes (77,696 sampled trees, meandiff=0.0068, maxdiff=0.11)). Colored dots in branches indicate corresponding branch supports. Thick branches indicate significant support by at least two metrics, one parametric and one non-parametric; branch support thresholds are shown in the center of the figure; see Methods.

967 **Supplementary File 1A: List of eukaryotic genomes.** We downloaded and  
968 analyzed the following annotated genomes using the "best" filtered protein sets when  
969 available. We gratefully acknowledge the Broad Institute, the DOE Joint Genome  
970 Institute, Génolevures, PlantGDB, SaccharomycesGD, AshbyaGD, DictyBase, JCV  
971 Institute, Sanger Institute, TetrahymenaGD, PythiumGD, AmoebaDB,  
972 NannochloroposisGD, OrcAE, TriTryDB, GiardiaDB, TrichDB, CyanophoraDB, and  
973 CyanidioschizonDB for making their annotated genomes publicly available. We  
974 especially thank D. Armaleo, I. Grigoriev, T. Jeffries, J. Spatafora, S. Baker, J.  
975 Collier, and T. Mock for allowing us to use their unpublished data.

976  
977 **Supplementary File 1B: Plasmids.**

978 **Supplementary File 1C: Strains.** All yeast strains were derived from W303 and  
979 constructed using standard methods.
